# Supplementary material for: Copy number variants reveal divergent genetic and diagnostic cortical signatures across psychiatric disorders
Source: Research Square preprint supplement (doi:10.21203/rs.3.rs-9246968/v1), 2026-05-06
Supplement: Supplementary file 2 [file f765949393656e3a49bebc32.xlsx]

## Sheet: ST_index
Table	Description
ST1	CNV data description, global effect sizes, and disorder hazard ratios
ST2	Psychiatric disorder data description and global effect sizes
ST3	Medication sub-group (NPD) data description and global effect sizes
ST4	Common Variants source description (GWAS Summary Statistics)
ST5	NPD GWAS SNPs and their cortical GWAS rankings
ST6	Regional consensus map profiles
ST7	Correlations between cortical gradient and regional consensus maps
ST8	PRS analysis (BD and SCZ) data description
ST9	PRS analysis (BD and SCZ) lm estimates and p-values
ST10	Variance inflation test for cortical surface area effects of disorder-associated SNPs
ST11	Simulated PRS–surface area associations under empirical and concordant sign distributions

## Sheet: ST_column_key
Supplementary Table	Column name	Column description
ST1	CNV	CNV
ST1	Breakpoints (Hg19, Mb)	Breakpoints/coordinates in Hg19 (Mb)
ST1	Type_CNV_SCA	Type: either copy number variant (CNV) or sex chromosome aneuploidy (SCA)
ST1	Type_Del_Dup	Type: deletion or duplication
ST1	es_TotalSA	Effect size (Cohen's d) for total SA
ST1	es_MeanCT	Effect size (Cohen's d) for mean CT
ST1	es_ratio_CT_SA	Ratio of absolute effect sizes (Cohen's d) for mean CT and total SA
ST1	Flag_published_computed	Flag indicating if we used published statistics or computed
ST1	Flag_regional_analysis	Flag indicating if the CNV was used in regional analysis
ST1	PubMedID_data_source	PubMedID for the data source or publication describing the data
ST1	Sample size (N)	Sample size (N)
ST1	Age (Mean (SD) in years)	Mean and standard deviation of age (in years)
ST1	Sex (M/F)	Sex (Male or Female)
ST1	Ascertainment (Cohorts)	Information about ascertainment and cohorts used (detailed in PubMedID reference)
ST1	HR_iPSYCH2015_ASD	Hazard ratio for ASD from iPSYCH2015 (ref: PMID: 37886536 and 36697121)
ST1	HR_iPSYCH2015_ADHD	Hazard ratio for ADHD from iPSYCH2015 (ref: PMID: 37886536 and 36697121)
ST1	HR_iPSYCH2015_BD	Hazard ratio for BD from iPSYCH2015 (ref: PMID: 37886536 and 36697121)
ST1	HR_iPSYCH2015_MDD	Hazard ratio for MDD from iPSYCH2015 (ref: PMID: 37886536 and 36697121)
ST1	HR_iPSYCH2015_SCZ	Hazard ratio for SCZ from iPSYCH2015 (ref: PMID: 37886536 and 36697121)
ST1	HR_iPSYCH2015_ID	Hazard ratio for Intellectual Disability (ID) from iPSYCH2015 (ref: PMID: 37886536 and 36697121)
ST1	HR_iPSYCH2015_ANY	Hazard ratio for any iPSYCH disorder from iPSYCH2015 (ref: PMID: 37886536 and 36697121)
ST2	Disorder	Disorder name
ST2	Disorder description	Disorder description
ST2	PubMedID_data_source	PubMedID for the data source or publication describing the data
ST2	es_TotalSA	Effect size (Cohen's d) for total SA
ST2	es_MeanCT	Effect size (Cohen's d) for mean CT
ST2	es_ratio_CT_SA	Ratio of absolute effect sizes (Cohen's d) for mean CT and total SA
ST2	Participant_age_group	Participant age group (either adult, young (adolescent), or pediatric (children)), grouped based on summary statistics source
ST2	Cases sample size (N)	Cases sample size (N)
ST2	Cases age (Mean (SD) in years)	Cases age (Mean (SD) in years)
ST2	Cases sex (M/F)	Cases sex (M/F)
ST2	Controls sample size (N)	Controls sample size (N)
ST2	Controls age (Mean (SD) in years)	Controls age (Mean (SD) in years)
ST2	Controls sex (M/F)	Controls sex (M/F)
ST3	Disorder	Disorder name
ST3	NPD_med_groups	Medication sub-groups following the data source two groups: medicated or unmedicated
ST3	Disorder description	Disorder medication description
ST3	PubMedID_data_source	PubMedID for the data source or publication describing the data
ST3	es_TotalSA	Effect size (Cohen's d) for total SA
ST3	es_MeanCT	Effect size (Cohen's d) for mean CT
ST3	es_ratio_CT_SA	Ratio of absolute effect sizes (Cohen's d) for mean CT and total SA
ST3	Participant_age_group	Participant age group (either adult, young (adolescent), or pediatric (children)), grouped based on summary statistics source
ST3	Cases sample size (N)	Cases sample size (N)
ST3	Controls sample size (N)	Controls sample size (N)
ST4	GWAS Summary Statistics	GWAS summary statistics for disoder or cortical structure
ST4	Source	Data source consortium, PGC or ENIGMA
ST4	Cases / Ctrls	Number of cases and controls
ST4	N GWAS sig SNPs	Number of GWAS significant independent loci (European ancestry)
ST4	Primary Reference	Reference publication describing the data
ST5	NPD	Psychiatric disorder with independent genome-wide significant SNP
ST5	PubMedID_NPD_GWAS	PubMedID for the disorder GWAS
ST5	NPD_SNP	Disorder SNP (independent genome-wide significant SNP)
ST5	Cortical_GWAS_BETA1	BETA1 estimate for the NPD-SNP from the Cortical GWAS (Grasby 2020)
ST5	Cortical_GWAS_P	p-value for the NPD-SNP from the Cortical GWAS (Grasby 2020)
ST5	Cortical_GWAS_Percentile_P	Percentile of p-value for the NPD-SNP from the Cortical GWAS (Grasby 2020)
ST5	Cortical_GWAS_metric	Cortical GWAS metric: either meanCT or totalSA
ST5	Flag_regional_analysis	Flag indicating if the SNP was used in regional analysis
ST6	Desikan_roi	Desikan cortical region name
ST6	cortical_gradient	cortical gradient: PC1 of transcriptomics data from Allen Brain Institute
ST6	MeanAbsES_SA_SNPs	Mean absolute effect sizes per ROI across SNPs for SA
ST6	MeanAbsES_CT_CNVs	Mean absolute effect sizes per ROI across CNVs for CT
ST6	MeanAbsES_SA_CNVs	Mean absolute effect sizes per ROI across CNVs for SA
ST6	MeanAbsES_CT_NPDs	Mean absolute effect sizes per ROI across NPDs for CT
ST6	MeanAbsES_SA_NPDs	Mean absolute effect sizes per ROI across NPDs for SA
ST6	Var_SA_SNPs	variance of effect sizes per ROI across SNPs for SA
ST6	Var_CT_CNVs	variance of effect sizes per ROI across CNVs for CT
ST6	Var_SA_CNVs	variance of effect sizes per ROI across CNVs for SA
ST6	Var_CT_NPDs	variance of effect sizes per ROI across NPDs for CT
ST6	Var_SA_NPDs	variance of effect sizes per ROI across NPDs for SA
ST6	Signif_SA_SNPs	percentage (%) significance (FDR) per ROI across SNPs for SA
ST6	Signif_CT_CNVs	percentage (%) significance (FDR) per ROI across CNVs for CT
ST6	Signif_SA_CNVs	percentage (%) significance (FDR) per ROI across CNVs for SA
ST6	Signif_CT_NPDs	percentage (%) significance (FDR) per ROI across NPDs for CT
ST6	Signif_SA_NPDs	percentage (%) significance (FDR) per ROI across NPDs for SA
ST6	PC1_SA_SNPs	PC1 loading per ROI (PCA across SNPs for SA)
ST6	PC1_CT_CNVs	PC1 loading per ROI (PCA across CNVs for CT)
ST6	PC1_SA_CNVs	PC1 loading per ROI (PCA across CNVs for SA)
ST6	PC1_CT_NPDs	PC1 loading per ROI (PCA across NPDs for CT)
ST6	PC1_SA_NPDs	PC1 loading per ROI (PCA across NPDs for SA)
ST7	concensus_measure	concensus map or measure name
ST7	map	map information (cortical metric and Disorder/genetic-variant)
ST7	cor	Pearson correlation (r) with the cortical gradient
ST7	pspin	spin permutation p-value, accounting for the spatial autocorrelation between cortical regions
ST7	leave1out_cor_95CI_lower	levae one out analysis based lower 95% confidence interval of pearson correlation (r) with cortical gradient
ST7	leave1out_cor_95CI_upper	levae one out analysis based upper 95% confidence interval of pearson correlation (r) with cortical gradient
ST8	Disorder	Disorder name (with PRS data)
ST8	PRS description	PRS description
ST8	sample size (MRI and PRS, N)	sample size, N, for participant with both MRI and PRS data
ST8	Age (Mean (SD) in years)	Age (Mean (SD) in years)
ST8	Sex (M/F)	Sex (M/F)
ST8	Ancestry	Ancestry
ST8	PRS field UKBB	PRS field ID in the UK Biobank
ST8	PubMedID_data_source	PubMedID for the data source describing the PRS computation for UK Biobank
ST9	Desikan_roi	Desikan cortical region name
ST9	Disorder_PRS	name of the PRS disorder
ST9	metric	cortical metric
ST9	PRS_lm_est	linear regression estimate
ST9	PRS_lm_pval	linear regression p-value
ST9	PRS_lm_pval_FDR	adjusted p-value (FDR multiple comparisons correction)
ST10	Disorder	Disorder (BD or SCZ)
ST10	N SNPs	Number of independent lead SNPs after harmonization
ST10	Observed Variance	Observed variance of total SA GWAS betas among disorder-associated SNPs
ST10	Null Variance (Median)	Median variance from 10000 MAF-matched null permutations
ST10	Variance Ratio	Ratio of observed variance to median null variance
ST10	P (variance)	One-sided permutation p-value for variance inflation
ST10	Observed Mean	Observed mean of total SA GWAS betas among disorder-associated SNPs
ST10	P (mean)	Two-sided permutation p-value for mean deviation from null
ST11	Disorder	Disorder (BD or SCZ)
ST11	Scenario	Simulation scenario: empirical (original signs) or concordant (all signs aligned to disorder effect)
ST11	N SNPs	Number of independent lead SNPs used in simulation
ST11	Median R¬≤	Median R-squared from PRS-SA regression across 10000 simulation replicates
ST11	95% CI Lower	2.5th percentile of simulated R-squared distribution
ST11	95% CI Upper	97.5th percentile of simulated R-squared distribution
ST11	N Simulations	Number of simulation replicates

## Sheet: ST1
CNV	Breakpoints (Hg19, Mb)	Type_CNV_SCA	Type_Del_Dup	es_TotalSA	es_MeanCT	es_ratio_CT_SA	Flag_published_computed	Flag_regional_analysis	PubMedID_data_source	Sample size (N)	Age (Mean (SD) in years)	Sex (M/F)	Ascertainment (Cohorts)	HR_iPSYCH2015_ASD	HR_iPSYCH2015_ADHD	HR_iPSYCH2015_BD	HR_iPSYCH2015_MDD	HR_iPSYCH2015_SCZ	HR_iPSYCH2015_ID	HR_iPSYCH2015_ANY
1q21.1 Del	chr1, 146.53–147.39	CNV	Del	-1.72	0.37	0.215116	computed	Yes	36865328	28	29 (18)	17/11	Clinical (BC, CDF, EU, SVIP)	2.37	1.93	3.52	2.08	1.75	5.38	2.12
										12	59 (7)	5/7	Nonclinical (UKB)
1q21.1 Dup	chr1, 146.53–147.39	CNV	Dup	0.68	0.08	0.117647	computed	Yes	36865328	17	35 (17)	9/8	Clinical (BC, CDF, EU, SVIP)	4.03	2.65	1.63	1.43	2.36	3.14	2.54
										13	62 (6)	9/4	Nonclinical (UKB)
7q11.23 Del (WBS)	chr7, 72.7–74.1	CNV	Del	-2.62	0.8	0.305344	published	No	34509290	meta_analysis				NA	NA	NA	NA	NA	NA	NA
15q11.2 Del	chr15, 22.81–23.09	CNV	Del	-0.3	0.38	1.26667	computed	Yes	36865328	108	65 (7)	59/49	Nonclinical (UKB)	1.45	1.43	0.63	1.17	1.29	1.25	1.3
15q11.2 Dup	chr15, 22.81–23.09	CNV	Dup	-0.1	-0.14	1.4	computed	Yes	36865328	144	64 (7)	77/67	Nonclinical (UKB)	1.07	1.42	1.26	1.07	1.25	1.46	1.21
16p11.2 dist. Del	chr16, 28.3 or 28.7–28.9	CNV	Del	-0.14	0.13	0.928571	published	No	34509290	meta_analysis				0.94	1.26	NA	1.04	2.42	2.76	1.23
16p11.2 dist. Dup	chr16, 28.3 or 28.7–28.9	CNV	Dup	-0.19	-0.27	1.42105	published	No	34509290	meta_analysis				1.26	1.57	1.89	1.17	2.38	1.86	1.32
16p11.2 prox. Del	chr16, 29.65–30.20	CNV	Del	0.6	-0.4	0.666667	computed	Yes	36865328	78	17 (11)	36/42	Clinical (BC, CDF, EU, SVIP)	3.07	0.77	NA	0.42	0.57	5.14	NA
										4	66 (3)	1/3	Nonclinical (UKB)
16p11.2 prox. Dup	chr16, 29.65–30.20	CNV	Dup	-0.96	-0.56	0.583333	computed	Yes	36865328	68	31 (15)	29/39	Clinical (BC, CDF, EU, SVIP)	2.04	2.63	0.53	1.04	1.22	4.43	NA
										7	65 (6)	3/4	Nonclinical (UKB)
16p13.11 Dup	chr16, 15.51–16.29	CNV	Dup	-0.129	0.094	0.730647	computed	Yes	36865328	50	66 (6)	26/24	Nonclinical (UKB)	1.84	2.01	0.8	1.38	2.05	2.04	1.7
Trisomy 21 (DS)	chr21	CNV	Dup	-1.67	0.16	0.0958084	published	No	34509290	meta_analysis				NA	NA	NA	NA	NA	NA	NA
22q11.2 Del	chr22, 19.04–21.47	CNV	Del	-1.18	0.66	0.559322	computed	Yes	36865328	68	14 (6)	33/35	Clinical (BC, CDF, UCLA)	1.5	1.17	NA	1.03	3.18	18.5	1.85
22q11.2 Dup	chr22, 19.04–21.47	CNV	Dup	0.29	-0.15	0.517241	computed	Yes	36865328	19	17 (13)	6/13	Clinical (BC, CDF, UCLA)	2.63	2.61	NA	1.02	2.02	3.8	1.85
										7	60 (11)	5/2	Nonclinical (UKB)
XXX	sex-chr	SCA	Dup	-1.22	-0.46	0.377049	published	No	34509290	meta_analysis				4.7	2.67	4.32	2.2	4.54	3.68	NA
XXY	sex-chr	SCA	Dup	-0.53	-0.19	0.358491	computed	Yes	37480975	77	16.9 (4.3)	NA	Raznahan Lab (NIMH)	2.72	1.99	1.62	1.88	2.92	1.42	NA
XYY	sex-chr	SCA	Dup	0.16	0.31	1.9375	computed	Yes	37480975	30	15.2 (6.1)	NA	Raznahan Lab (NIMH)	5.61	4.45	3.22	2.65	4.6	1.77	NA
XXYY	sex-chr	SCA	Dup	-0.53	-0.11	0.207547	published_meta_analysis	No	34509290	meta_analysis				NA	NA	NA	NA	NA	NA	NA
X (TS)	sex-chr	SCA	Del	0.19	0.29	1.52632	published_meta_analysis	No	34509290	meta_analysis				8.45	6.15	NA	1.62	1.8	3.51	NA
Controls	NA	CNV	NA				computed	Yes	36865328	317	26 (14)	142/175	Clinical (BC, CDF, EU, SVIP, UCLA)
										465	64 (7)	245/220	Nonclinical (UKB)
		SCA XXY					computed	Yes	37480975	53	18.2 (5.4)	NA	Raznahan Lab (NIMH)
		SCA XYY					computed	Yes	37480975	35	15.1 (4.6)	NA	Raznahan Lab (NIMH)

## Sheet: ST2
Disorder	Disorder description	PubMedID_data_source	es_TotalSA	es_MeanCT	es_ratio_CT_SA	Participant_age_group	Cases sample size (N)	Cases age (Mean (SD) in years)	Cases sex (M/F)	Controls sample size (N)	Controls age (Mean (SD) in years)	Controls sex (M/F)
ASD	autism spectrum disorder	32539527	0.01	0.04	4	Adult	489	26.03 (9)	432/57	2869	29.74 (9.88)	1634/1235
SCZ	schizophrenia	29960671	-0.25	-0.52	2.08	Adult	4474	32.3 (-)	2957/1517	5098	32.8 (-)	2706/2392
ADHD	attention deficit hyperactivity disorder	32539527	-0.03	0.01	0.333333	Adult	929	29.82 (10.19)	622/307	2869	29.74 (9.88)	1634/1235
MDD	major depressive disorder	27137745	0.0165	-0.053	3.21212	Adult	1911	>21	-	7663	>21	-
BD	bipolar disorder	28461699	-0.046	-0.08	1.73913	Adult	1769	-	-	2559	-	-
OCD	obsessive-compulsive disorder	32539527	-0.0465	-0.099	2.12903	Adult	1824	31.69 (9.66)	923/901	2869	29.74 (9.88)	1634/1235
CHRPS+	clinical high risk for psychosis, who later developed a psychotic disorder	33950164	-0.09	-0.26	2.88889	Adult	217	18.5 (3)	128/89	1009	19.8 (3.1)	555/454
CHRPS-	clinical high risk for psychosis, who did not develop a psychotic disorder	33950164	-0.15	-0.18	1.2	Adult	1014	18.9 (2.9)	517/497	1009	19.8 (3.1)	555/454
ASD-y	autism spectrum disorder (young)	32539527	-0.06	-0.14	2.33333	Young	565	14.4 (1.66)	492/73	1368	14.37 (1.71)	937/431
ADHD-y	attention deficit hyperactivity disorder (young)	32539527	-0.03	-0.01	0.333333	Young	633	14 (1.65)	514/119	1368	14.37 (1.71)	937/431
CD	conduct disorder	39025633	-0.24	-0.05	0.208333	Young	1185	13.7 (3)	846/339	1253	13.4 (3)	807/446
OCD-y	obsessive-compulsive disorder (young)	32539527	-0.03	-0.17	5.66667	Young	359	14.91 (1.72)	195/164	1368	14.37 (1.71)	937/431
BD-y	bipolar disorder (young)	28461699	-0.0415	-0.112	2.6988	Young	408	<25	-	1034	<25	-
MDD-y	major depressive disorder (young)	27137745	0.224	-0.021	0.09375	Young	237	<21	-	294	<21	-
ASD-p	autism spectrum disorder (pediatric)	32539527	-0.05	-0.2	4	Pediatric	723	8.64 (2.46)	588/135	1590	9.35 (1.72)	997/593
ADHD-p	attention deficit hyperactivity disorder (pediatric)	32539527	-0.09	-0.07	0.777778	Pediatric	709	9.41 (1.33)	530/179	1590	9.35 (1.72)	997/594
OCD-p	obsessive-compulsive disorder (pediatric)	32539527	-0.06	-0.13	2.16667	Pediatric	140	10.3 (1.2)	76/64	1590	9.35 (1.72)	997/595

## Sheet: ST3
Disorder	NPD_med_groups	Disorder description	PubMedID_data_source	es_TotalSA	es_MeanCT	es_ratio_CT_SA	Participant_age_group	Cases sample size (N)	Controls sample size (N)
ASD	medicated	autism spectrum disorder	32539527	0.06	-0.18	3	Adult	46	2869
ADHD	medicated	attention deficit hyperactivity disorder	32539527	0.003	-0.02	6.66667	Adult	119	2869
MDD	medicated	major depressive disorder patients using antidepressant medication at time of scanning	27137745	0.068	-0.108	1.58824	Adult	951	7223
OCD	medicated	obsessive-compulsive disorder	32539527	0.0049	-0.15	30.6122	Adult	829	2869
SCZ-m1	medicated	schizophrenia 1st generation antipsychotic	29960671	-0.321	-0.765	2.38318	Adult	430	2888
SCZ-m2	medicated	schizophrenia 2nd generation antipsychotic	29960671	-0.268	-0.536	2	Adult	2218	4098
SCZ-m12	medicated	schizophrenia 1st & 2nd generation antipsychotic	29960671	-0.205	-0.77	3.7561	Adult	246	3149
BD-m1	medicated	bipolar disorder lithium	28461699	0.085	0.14	1.64706	Adult	653	872
BD-m2	medicated	bipolar disorder antiepileptics	28461699	-0.0135	-0.313	23.1852	Adult	535	906
ASD-y	medicated	autism spectrum disorder (young)	32539527	0.02	-0.12	6	Young	74	1368
ADHD-y	medicated	attention deficit hyperactivity disorder (young)	32539527	-0.01	-0.05	5	Young	212	1368
OCD-y	medicated	obsessive-compulsive disorder (young)	32539527	-0.06	-0.19	3.16667	Young	172	1368
BD-y-m1	medicated	bipolar disorder (young) lithium	28461699	-0.2385	0.299	1.25367	Young	74	250
BD-y-m2	medicated	bipolar disorder (young) antiepileptics	28461699	-0.0145	-0.5925	40.8621	Young	97	224
MDD-y	medicated	major depressive disorder (young) patients using antidepressant medication at time of scanning	27137745	-0.3235	-0.051	0.157651	Young	82	142
ASD-p	medicated	autism spectrum disorder (pediatric)	32539527	-0.19	-0.26	1.36842	Pediatric	97	1590
ADHD-p	medicated	attention deficit hyperactivity disorder (pediatric)	32539527	-0.16	0.02	0.125	Pediatric	126	1590
OCD-p	medicated	obsessive-compulsive disorder (pediatric)	32539527	-0.1	-0.16	1.6	Pediatric	38	1590
ASD	unmedicated	autism spectrum disorder	32539527	0.07	0.08	1.14286	Adult	180	2869
ADHD	unmedicated	attention deficit hyperactivity disorder	32539527	-0.05	0.003	0.06	Adult	531	2869
MDD	unmedicated	major depressive disorder (patients not taking antidepressants at time of scanning)	27137745	-0.0115	-0.0225	1.95652	Adult	916	7249
OCD	unmedicated	obsessive-compulsive disorder	32539527	-0.02	0.01	0.5	Adult	974	2869
SCZ	unmedicated	schizophrenia	29960671	-0.246	-0.275	1.11789	Adult	412	2810
ASD-y	unmedicated	autism spectrum disorder (young)	32539527	-0.12	-0.06	0.5	Young	153	1368
ADHD-y	unmedicated	attention deficit hyperactivity disorder (young)	32539527	-0.1	0.02	0.2	Young	275	1368
OCD-y	unmedicated	obsessive-compulsive disorder (young)	32539527	0.01	-0.16	16	Young	185	1368
MDD-y	unmedicated	major depressive disorder (young) patients not taking antidepressants at time of scanning	27137745	-0.37	-0.1425	0.385135	Young	119	234
ASD-p	unmedicated	autism spectrum disorder (young)	32539527	-0.04	-0.04	1	Pediatric	316	1590
ADHD-p	unmedicated	attention deficit hyperactivity disorder (pediatric)	32539527	-0.04	-0.04	1	Pediatric	312	1590
OCD-p	unmedicated	obsessive-compulsive disorder (pediatric)	32539527	-0.06	-0.06	1	Pediatric	102	1590

## Sheet: ST4
GWAS Summary Statistics	Source	Cases / Ctrls	N GWAS sig SNPs	Primary Reference
ADHD	PGC	38,691 / 186,843	27	Demontis et al. 2023
Bipolar Disorder (BD)	PGC	41,917 / 371,549	239	O’Connell et al. 2025
Major Depression (MDD)	PGC	~340,000 / ~800k	180	Meng et al. 2024
Schizophrenia (SCZ)	PGC	76,755 / 243,649	259	Trubetskoy et al. 2022
Cortical Structure	ENIGMA	N = 51,665	369	Grasby et al. 2020

## Sheet: ST5
NPD	PubMedID_NPD_GWAS	NPD_SNP	Cortical_GWAS_BETA1	Cortical_GWAS_P	Cortical_GWAS_Percentile_P	Cortical_GWAS_metric	Flag_regional_analysis
ADHD	36702997	rs549845	0.0004	0.6391	0.355032	meanCT	No
ADHD	36702997	rs1438898	0.0001	0.9268	0.0716828	meanCT	No
ADHD	36702997	rs2886697	-0.0007	0.3668	0.624943	meanCT	No
ADHD	36702997	rs9877066	0.0016	0.3356	0.655072	meanCT	No
ADHD	36702997	rs7613360	-0.0012	0.1231	0.867215	meanCT	No
ADHD	36702997	rs2311059	0.0009	0.2641	0.726412	meanCT	No
ADHD	36702997	rs17718444	-0.0011	0.1679	0.822064	meanCT	No
ADHD	36702997	rs114142727	-0.0031	0.3694	0.622356	meanCT	No
ADHD	36702997	rs17576773	-0.001	0.3924	0.599206	meanCT	No
ADHD	36702997	rs6537401	-0.0006	0.4438	0.548257	meanCT	No
ADHD	36702997	rs4916723	-0.0019	0.01266	0.982895	meanCT	No
ADHD	36702997	rs77960	-0.0001	0.9313	0.0670701	meanCT	No
ADHD	36702997	rs10875612	0.0001	0.8955	0.102364	meanCT	No
ADHD	36702997	rs2025286	0.0001	0.9462	0.0522985	meanCT	No
ADHD	36702997	rs73145587	-0.0012	0.3558	0.635638	meanCT	No
ADHD	36702997	rs9969232	0.0011	0.1582	0.831939	meanCT	No
ADHD	36702997	rs7844069	0.0002	0.7746	0.22114	meanCT	No
ADHD	36702997	rs4925811	0.0002	0.8405	0.15649	meanCT	No
ADHD	36702997	rs11255890	0.0009	0.2367	0.75358	meanCT	No
ADHD	36702997	rs11596214	0.0008	0.2934	0.697397	meanCT	No
ADHD	36702997	rs2582895	-0.0018	0.01712	0.977814	meanCT	No
ADHD	36702997	rs704061	-0.0002	0.84	0.156986	meanCT	No
ADHD	36702997	rs76284431	0.0004	0.7018	0.293107	meanCT	No
ADHD	36702997	rs1162202	-0.0013	0.1004	0.890395	meanCT	No
ADHD	36702997	rs76857496	0.0006	0.5986	0.39545	meanCT	No
ADHD	36702997	rs7506904	0.0007	0.3912	0.600435	meanCT	No
ADHD	36702997	rs6082363	-0.0009	0.2825	0.708293	meanCT	No
ADHD	36702997	rs549845	261.465	0.02678	0.965646	totalSA	Yes
ADHD	36702997	rs1438898	65.8049	0.5993	0.390358	totalSA	Yes
ADHD	36702997	rs2886697	-15.9638	0.8879	0.109145	totalSA	Yes
ADHD	36702997	rs9877066	315.801	0.1852	0.80083	totalSA	Yes
ADHD	36702997	rs7613360	-100.817	0.3773	0.608501	totalSA	Yes
ADHD	36702997	rs2311059	-293.108	0.01855	0.974938	totalSA	Yes
ADHD	36702997	rs17718444	336.76	0.003871	0.993184	totalSA	Yes
ADHD	36702997	rs114142727	-89.9598	0.8597	0.136606	totalSA	Yes
ADHD	36702997	rs17576773	-184.321	0.2573	0.72841	totalSA	Yes
ADHD	36702997	rs6537401	120.168	0.307	0.678716	totalSA	Yes
ADHD	36702997	rs4916723	-148.692	0.1824	0.803645	totalSA	Yes
ADHD	36702997	rs77960	-151.587	0.1974	0.788494	totalSA	Yes
ADHD	36702997	rs10875612	48.0028	0.6599	0.331164	totalSA	Yes
ADHD	36702997	rs2025286	148.752	0.1798	0.806255	totalSA	Yes
ADHD	36702997	rs73145587	67.0528	0.7131	0.279341	totalSA	Yes
ADHD	36702997	rs9969232	-10.8511	0.9245	0.0735624	totalSA	Yes
ADHD	36702997	rs7844069	-80.2314	0.4674	0.519472	totalSA	Yes
ADHD	36702997	rs4925811	345.019	0.002423	0.99531	totalSA	Yes
ADHD	36702997	rs11255890	130.653	0.2459	0.739808	totalSA	Yes
ADHD	36702997	rs11596214	-87.6497	0.4384	0.547882	totalSA	Yes
ADHD	36702997	rs2582895	-21.0732	0.8516	0.144475	totalSA	Yes
ADHD	36702997	rs704061	-8.0561	0.9415	0.056913	totalSA	Yes
ADHD	36702997	rs76284431	-351.9	0.0237	0.969045	totalSA	Yes
ADHD	36702997	rs1162202	-67.9405	0.5591	0.429672	totalSA	Yes
ADHD	36702997	rs76857496	242.542	0.1259	0.861035	totalSA	Yes
ADHD	36702997	rs7506904	174.067	0.125	0.861955	totalSA	Yes
ADHD	36702997	rs6082363	135.418	0.2664	0.719325	totalSA	Yes
BD	39843750	rs1132790	-0.0006	0.4107	0.581271	meanCT	No
BD	39843750	rs4660531	-0.0019	0.01279	0.982738	meanCT	No
BD	39843750	rs11210892	-0.0001	0.9201	0.0784493	meanCT	No
BD	39843750	rs34723450	0.0001	0.9074	0.090822	meanCT	No
BD	39843750	rs112913804	0.0027	0.1522	0.837974	meanCT	No
BD	39843750	rs8179409	0.0008	0.2951	0.695762	meanCT	No
BD	39843750	rs74726984	-0.001	0.4661	0.526432	meanCT	No
BD	39843750	rs12407573	-0.0006	0.5917	0.402219	meanCT	No
BD	39843750	rs12039183	0.0009	0.4372	0.554891	meanCT	No
BD	39843750	rs2154010	0.0004	0.671	0.323603	meanCT	No
BD	39843750	rs326655	-0.0007	0.3423	0.648688	meanCT	No
BD	39843750	rs3862908	0.0015	0.08123	0.910179	meanCT	No
BD	39843750	rs1325758	-0.0014	0.06058	0.931769	meanCT	No
BD	39843750	rs2477063	0.0006	0.5408	0.452385	meanCT	No
BD	39843750	rs12083466	-0.0002	0.8351	0.161805	meanCT	No
BD	39843750	rs2339515	0	0.9628	0.0361971	meanCT	No
BD	39843750	rs1509392	-0.0006	0.4023	0.589524	meanCT	No
BD	39843750	rs719504	-0.0004	0.5818	0.41196	meanCT	No
BD	39843750	rs4274628	0.0006	0.4444	0.547672	meanCT	No
BD	39843750	rs55871458	-0.0009	0.3601	0.631482	meanCT	No
BD	39843750	rs583168	0.0008	0.2762	0.714475	meanCT	No
BD	39843750	rs3136359	-0.0015	0.09114	0.899912	meanCT	No
BD	39843750	rs149002246	-0.0004	0.818	0.178635	meanCT	No
BD	39843750	rs17399773	0.0006	0.5303	0.462918	meanCT	No
BD	39843750	rs1030318	0.001	0.1894	0.800415	meanCT	No
BD	39843750	rs78381888	0.0031	0.01293	0.982576	meanCT	No
BD	39843750	rs4851134	-0.0009	0.2861	0.70478	meanCT	No
BD	39843750	rs3792150	0.0016	0.05477	0.937711	meanCT	No
BD	39843750	rs2569963	0.0021	0.006014	0.990904	meanCT	No
BD	39843750	rs7426273	-0.0014	0.1662	0.823739	meanCT	No
BD	39843750	rs4447623	-0.0003	0.6923	0.302579	meanCT	No
BD	39843750	rs3811038	0.0015	0.08285	0.908441	meanCT	No
BD	39843750	rs4608528	0.0006	0.4602	0.532198	meanCT	No
BD	39843750	rs7578553	0.0002	0.755	0.240608	meanCT	No
BD	39843750	rs2357978	0.0005	0.5791	0.414535	meanCT	No
BD	39843750	rs12692625	-0.0005	0.5263	0.466738	meanCT	No
BD	39843750	rs10490563	0.0014	0.1124	0.878156	meanCT	No
BD	39843750	rs1116173	-0.0012	0.1899	0.799937	meanCT	No
BD	39843750	rs6433891	0.0002	0.8034	0.192917	meanCT	No
BD	39843750	rs1429428	-0.0015	0.07531	0.916354	meanCT	No
BD	39843750	rs13404366	-0.0002	0.7612	0.234568	meanCT	No
BD	39843750	rs1025753	0.0004	0.6287	0.365889	meanCT	No
BD	39843750	rs4674623	-0.001	0.1898	0.800025	meanCT	No
BD	39843750	rs72974238	0.0003	0.7379	0.257486	meanCT	No
BD	39843750	rs4143282	0.0003	0.7312	0.263998	meanCT	No
BD	39843750	rs6771524	0.0001	0.9242	0.0741862	meanCT	No
BD	39843750	rs6549953	0.0008	0.3271	0.664368	meanCT	No
BD	39843750	rs9834970	-0.0004	0.6264	0.368027	meanCT	No
BD	39843750	rs1320163	0.0008	0.4644	0.52807	meanCT	No
BD	39843750	rs75661790	-0.0007	0.5109	0.481962	meanCT	No
BD	39843750	rs9813415	-0.0011	0.1646	0.825343	meanCT	No
BD	39843750	rs6441861	0.0005	0.5559	0.437604	meanCT	No
BD	39843750	rs12631337	-0.0005	0.5364	0.456909	meanCT	No
BD	39843750	rs12639116	-0.0003	0.8442	0.152893	meanCT	No
BD	39843750	rs34040100	-0.0014	0.3344	0.657385	meanCT	No
BD	39843750	rs62264770	-0.0004	0.7326	0.262649	meanCT	No
BD	39843750	rs1456196	-0.0006	0.5424	0.450837	meanCT	No
BD	39843750	rs12485841	-0.0007	0.385	0.606754	meanCT	No
BD	39843750	rs10934458	-0.0006	0.5085	0.484302	meanCT	No
BD	39843750	rs1879091	-0.0015	0.1482	0.842181	meanCT	No
BD	39843750	rs546738	0.0002	0.8023	0.193954	meanCT	No
BD	39843750	rs9869577	0.0018	0.02233	0.972106	meanCT	No
BD	39843750	rs75608688	-0.0006	0.5619	0.431797	meanCT	No
BD	39843750	rs762855	-0.0017	0.02768	0.966328	meanCT	No
BD	39843750	rs4697446	0.0005	0.5206	0.472194	meanCT	No
BD	39843750	rs13353610	-0.0002	0.7569	0.238754	meanCT	No
BD	39843750	rs10000365	-0.0002	0.7688	0.227034	meanCT	No
BD	39843750	rs2651570	0.0004	0.5702	0.423339	meanCT	No
BD	39843750	rs2651571	-0.0005	0.552	0.441457	meanCT	No
BD	39843750	rs4863729	-0.0013	0.0827	0.908705	meanCT	No
BD	39843750	rs17729514	0.0004	0.7675	0.22831	meanCT	No
BD	39843750	rs1425523	-0.0005	0.6671	0.327453	meanCT	No
BD	39843750	rs62340589	-0.0002	0.8514	0.145599	meanCT	No
BD	39843750	rs72701946	0.0001	0.9599	0.0389741	meanCT	No
BD	39843750	rs1392446	0.0011	0.1587	0.83144	meanCT	No
BD	39843750	rs16877131	-0.0014	0.1455	0.844788	meanCT	No
BD	39843750	rs40465	0.0002	0.7848	0.211151	meanCT	No
BD	39843750	rs288179	0.0014	0.08821	0.902926	meanCT	No
BD	39843750	rs32253	-0.0019	0.1755	0.814481	meanCT	No
BD	39843750	rs17703995	-0.0025	0.03435	0.959268	meanCT	No
BD	39843750	rs13161666	0.0011	0.2749	0.715724	meanCT	No
BD	39843750	rs3811996	-0.0009	0.2556	0.734799	meanCT	No
BD	39843750	rs10071347	-0.0001	0.8625	0.134618	meanCT	No
BD	39843750	rs73369037	-0.0022	0.1991	0.790604	meanCT	No
BD	39843750	rs112292112	-0.0005	0.8317	0.165091	meanCT	No
BD	39843750	rs2757021	-0.0019	0.04052	0.952778	meanCT	No
BD	39843750	rs2730854	0.002	0.0339	0.959789	meanCT	No
BD	39843750	rs1593652	-0.0002	0.8185	0.178114	meanCT	No
BD	39843750	rs62420384	0.0023	0.3064	0.684504	meanCT	No
BD	39843750	rs1487445	0.0003	0.7043	0.290704	meanCT	No
BD	39843750	rs9375946	0.0008	0.3074	0.683534	meanCT	No
BD	39843750	rs17792983	0.0001	0.9536	0.0450959	meanCT	No
BD	39843750	rs6911230	-0.0004	0.576	0.417535	meanCT	No
BD	39843750	rs73042690	0.0017	0.2371	0.753171	meanCT	No
BD	39843750	rs11979128	0.0013	0.1054	0.885274	meanCT	No
BD	39843750	rs78719272	0.0017	0.1122	0.878354	meanCT	No
BD	39843750	rs2539968	0.0005	0.5421	0.451128	meanCT	No
BD	39843750	rs6954854	-0.0006	0.4343	0.557719	meanCT	No
BD	39843750	rs767329	0.0024	0.03982	0.953492	meanCT	No
BD	39843750	rs11770210	-0.0014	0.1784	0.81144	meanCT	No
BD	39843750	rs75621211	0.0001	0.962	0.036944	meanCT	No
BD	39843750	rs3778934	0.002	0.009	0.987251	meanCT	No
BD	39843750	rs117450257	-0.0002	0.9198	0.0787323	meanCT	No
BD	39843750	rs11765899	-0.0011	0.1473	0.843046	meanCT	No
BD	39843750	rs73188321	0.0014	0.137	0.853295	meanCT	No
BD	39843750	rs2189010	0.0012	0.1142	0.87629	meanCT	No
BD	39843750	rs10953766	-0.0016	0.0386	0.954773	meanCT	No
BD	39843750	rs71563618	-0.0007	0.5766	0.416964	meanCT	No
BD	39843750	rs17137753	0.0001	0.9456	0.0528559	meanCT	No
BD	39843750	rs4386905	0.0001	0.8521	0.144929	meanCT	No
BD	39843750	rs34997884	-0.0008	0.3494	0.641859	meanCT	No
BD	39843750	rs13227429	-0.0006	0.4316	0.560427	meanCT	No
BD	39843750	rs55806395	-0.0003	0.7206	0.274682	meanCT	No
BD	39843750	rs55669358	0.0012	0.362	0.629633	meanCT	No
BD	39843750	rs4469447	0.0005	0.5528	0.440698	meanCT	No
BD	39843750	rs16916741	0.0005	0.5593	0.434287	meanCT	No
BD	39843750	rs10957165	0.0007	0.4604	0.532004	meanCT	No
BD	39843750	rs10957300	0.0002	0.8412	0.155792	meanCT	No
BD	39843750	rs12541158	-0.0007	0.3378	0.652978	meanCT	No
BD	39843750	rs990132	0.0004	0.6448	0.349515	meanCT	No
BD	39843750	rs1392518	-0.0004	0.6712	0.323418	meanCT	No
BD	39843750	rs12685098	0.0023	0.02599	0.968189	meanCT	No
BD	39843750	rs1330255	-0.0009	0.235	0.755295	meanCT	No
BD	39843750	rs4327938	0.0008	0.2906	0.700268	meanCT	No
BD	39843750	rs565593	-0.0011	0.2419	0.748506	meanCT	No
BD	39843750	rs542811	-0.0011	0.2463	0.744155	meanCT	No
BD	39843750	rs13284901	0.0013	0.1025	0.88821	meanCT	No
BD	39843750	rs6475111	-0.0011	0.213	0.776894	meanCT	No
BD	39843750	rs56244625	-0.0001	0.8965	0.101418	meanCT	No
BD	39843750	rs13301360	0	0.9719	0.027473	meanCT	No
BD	39843750	rs13302882	0	0.9535	0.0451892	meanCT	No
BD	39843750	rs9408285	0.0012	0.1106	0.879966	meanCT	No
BD	39843750	rs4483247	-0.0011	0.2722	0.718407	meanCT	No
BD	39843750	rs7852593	-0.0004	0.6265	0.367935	meanCT	No
BD	39843750	rs3815563	-0.0008	0.4361	0.55595	meanCT	No
BD	39843750	rs10491851	-0.0005	0.5858	0.407973	meanCT	No
BD	39843750	rs13296664	-0.0004	0.6353	0.358713	meanCT	No
BD	39843750	rs10984746	0.0001	0.9254	0.0730323	meanCT	No
BD	39843750	rs10984747	-0.0002	0.8476	0.149212	meanCT	No
BD	39843750	rs13300856	0.0001	0.9495	0.0490876	meanCT	No
BD	39843750	rs10781533	-0.0006	0.466	0.526531	meanCT	No
BD	39843750	rs2253422	0.001	0.1912	0.798611	meanCT	No
BD	39843750	rs2154393	-0.0019	0.1707	0.819277	meanCT	No
BD	39843750	rs56015006	-0.0018	0.03138	0.96242	meanCT	No
BD	39843750	rs11001471	0.0015	0.1623	0.827685	meanCT	No
BD	39843750	rs61867294	-0.0003	0.7508	0.244686	meanCT	No
BD	39843750	rs703482	0.0012	0.2688	0.721752	meanCT	No
BD	39843750	rs9787575	-0.0018	0.08259	0.908815	meanCT	No
BD	39843750	rs61873575	0.0003	0.7332	0.262066	meanCT	No
BD	39843750	rs2585813	0.0018	0.01866	0.97612	meanCT	No
BD	39843750	rs10767826	0.0001	0.8886	0.109086	meanCT	No
BD	39843750	rs1746942	0	0.9805	0.0192668	meanCT	No
BD	39843750	rs61885711	0.0022	0.4435	0.548541	meanCT	No
BD	39843750	rs61882743	0.0019	0.05939	0.933003	meanCT	No
BD	39843750	rs198470	-0.0006	0.445	0.547106	meanCT	No
BD	39843750	rs102275	0.0033	2.711e-05	0.999728	meanCT	No
BD	39843750	rs12805133	0.0004	0.6037	0.390271	meanCT	No
BD	39843750	rs7117514	0.0011	0.139	0.851286	meanCT	No
BD	39843750	rs1827603	0.0003	0.7397	0.255767	meanCT	No
BD	39843750	rs12577012	0.0018	0.019	0.975737	meanCT	No
BD	39843750	rs11218791	-0.0005	0.5225	0.470368	meanCT	No
BD	39843750	rs609618	-0.0006	0.4655	0.527003	meanCT	No
BD	39843750	rs598659	-0.0005	0.4878	0.504833	meanCT	No
BD	39843750	rs2298489	0.0004	0.6531	0.34136	meanCT	No
BD	39843750	rs17601612	-0.0008	0.3072	0.683719	meanCT	No
BD	39843750	rs4319542	-0.0003	0.6892	0.305614	meanCT	No
BD	39843750	rs67649878	0.0006	0.6498	0.344662	meanCT	No
BD	39843750	rs4298967	-0.0009	0.2375	0.752778	meanCT	No
BD	39843750	rs78406069	0.0007	0.4842	0.508356	meanCT	No
BD	39843750	rs7976870	-0.0006	0.4307	0.561313	meanCT	No
BD	39843750	rs10879804	0.0011	0.2661	0.724478	meanCT	No
BD	39843750	rs1179434	0.0012	0.1237	0.866655	meanCT	No
BD	39843750	rs55647329	0.0008	0.4797	0.513028	meanCT	No
BD	39843750	rs7962128	0.0005	0.484	0.508548	meanCT	No
BD	39843750	rs7980294	-0.0018	0.01625	0.978762	meanCT	No
BD	39843750	rs9595606	-0.0001	0.8988	0.0991381	meanCT	No
BD	39843750	rs79351007	0.0003	0.8115	0.184952	meanCT	No
BD	39843750	rs12584829	0.001	0.2055	0.784461	meanCT	No
BD	39843750	rs17059996	0.0001	0.9175	0.0809736	meanCT	No
BD	39843750	rs943710	0.0016	0.03936	0.953985	meanCT	No
BD	39843750	rs314690	-0.0013	0.08703	0.904133	meanCT	No
BD	39843750	rs7322790	0.0011	0.1502	0.839914	meanCT	No
BD	39843750	rs9554338	0.0002	0.8023	0.193954	meanCT	No
BD	39843750	rs35985675	-0.0025	0.01208	0.983587	meanCT	No
BD	39843750	rs2798398	0.0012	0.1365	0.853781	meanCT	No
BD	39843750	rs12431576	-0.001	0.2045	0.785445	meanCT	No
BD	39843750	rs2693698	-0.0001	0.9203	0.0782639	meanCT	No
BD	39843750	rs10047805	0	0.9631	0.0359248	meanCT	No
BD	39843750	rs11632852	-0.0001	0.8635	0.133634	meanCT	No
BD	39843750	rs7178343	0	0.9708	0.0285153	meanCT	No
BD	39843750	rs650366	0.0019	0.02561	0.968597	meanCT	No
BD	39843750	rs4404022	-0.0003	0.6959	0.299119	meanCT	No
BD	39843750	rs9920550	0.0005	0.6435	0.35078	meanCT	No
BD	39843750	rs2879976	-0.0007	0.4325	0.559526	meanCT	No
BD	39843750	rs2019611	-0.0008	0.3778	0.613874	meanCT	No
BD	39843750	rs28541419	0.0009	0.3394	0.651474	meanCT	No
BD	39843750	rs4702	0.0006	0.4325	0.559526	meanCT	No
BD	39843750	rs716508	-0.0007	0.3674	0.624346	meanCT	No
BD	39843750	rs12926477	-0.001	0.269	0.721562	meanCT	No
BD	39843750	rs4456522	0	0.962	0.036944	meanCT	No
BD	39843750	rs9935387	0.0006	0.5017	0.491001	meanCT	No
BD	39843750	rs142058	-0.0007	0.499	0.493862	meanCT	No
BD	39843750	rs1095163	0.0001	0.8518	0.145221	meanCT	No
BD	39843750	rs9302575	0.0003	0.6601	0.334464	meanCT	No
BD	39843750	rs60740701	0.0014	0.06839	0.92358	meanCT	No
BD	39843750	rs7192848	-0.0006	0.4165	0.575525	meanCT	No
BD	39843750	rs8057081	0	0.9749	0.0245981	meanCT	No
BD	39843750	rs4888526	-0.0009	0.3591	0.63246	meanCT	No
BD	39843750	rs992269	-0.0023	0.00611	0.990783	meanCT	No
BD	39843750	rs12932628	-0.0018	0.03727	0.956151	meanCT	No
BD	39843750	rs1008362	0.0002	0.8136	0.182921	meanCT	No
BD	39843750	rs34670005	-0.0009	0.2577	0.732749	meanCT	No
BD	39843750	rs7502233	-0.0008	0.2764	0.714283	meanCT	No
BD	39843750	rs2269905	0.0011	0.1504	0.83972	meanCT	No
BD	39843750	rs9304116	-0.0009	0.5155	0.477507	meanCT	No
BD	39843750	rs11082129	0.0009	0.2622	0.728253	meanCT	No
BD	39843750	rs17655644	0.0008	0.4635	0.528946	meanCT	No
BD	39843750	rs17656030	-0.0015	0.208	0.781977	meanCT	No
BD	39843750	rs17410557	-0.0005	0.5021	0.49061	meanCT	No
BD	39843750	rs12967143	0.0005	0.521	0.47182	meanCT	No
BD	39843750	rs7240986	-0.001	0.1939	0.795939	meanCT	No
BD	39843750	rs17090052	0.0002	0.7745	0.221226	meanCT	No
BD	39843750	rs17802226	-0.0003	0.7398	0.255677	meanCT	No
BD	39843750	rs7248205	-0.0007	0.3888	0.602769	meanCT	No
BD	39843750	rs12975001	-0.001	0.5282	0.464929	meanCT	No
BD	39843750	rs16975663	0.0036	0.003122	0.9947	meanCT	No
BD	39843750	rs73049975	-0.0013	0.5556	0.437885	meanCT	No
BD	39843750	rs10408774	0.0007	0.3423	0.648688	meanCT	No
BD	39843750	rs148108087	-0.0022	0.3015	0.689424	meanCT	No
BD	39843750	rs7257212	0.0001	0.9405	0.0579797	meanCT	No
BD	39843750	rs16995929	0	0.9903	0.00990178	meanCT	No
BD	39843750	rs932388	-0.0007	0.3702	0.621585	meanCT	No
BD	39843750	rs6125656	-0.0009	0.3586	0.632947	meanCT	No
BD	39843750	rs35277443	0.0014	0.1383	0.851973	meanCT	No
BD	39843750	rs911168	-0.0002	0.8093	0.187382	meanCT	No
BD	39843750	rs2009159	-0.0025	0.08579	0.905433	meanCT	No
BD	39843750	rs5994432	0.0019	0.03517	0.958413	meanCT	No
BD	39843750	rs9611440	-0.001	0.1867	0.803187	meanCT	No
BD	39843750	rs9611525	-0.0016	0.05637	0.936076	meanCT	No
BD	39843750	rs1132790	1.1884	0.9913	0.00849548	totalSA	Yes
BD	39843750	rs4660531	357.702	0.001836	0.996168	totalSA	Yes
BD	39843750	rs11210892	298.359	0.01016	0.984917	totalSA	Yes
BD	39843750	rs34723450	-143.453	0.3064	0.679296	totalSA	Yes
BD	39843750	rs112913804	-130.715	0.6317	0.358644	totalSA	Yes
BD	39843750	rs8179409	-74.0787	0.4992	0.488236	totalSA	Yes
BD	39843750	rs74726984	-62.1407	0.7632	0.230528	totalSA	Yes
BD	39843750	rs12407573	141.886	0.3874	0.598437	totalSA	Yes
BD	39843750	rs12039183	-174.132	0.2828	0.702895	totalSA	Yes
BD	39843750	rs2154010	-37.9841	0.7753	0.218753	totalSA	Yes
BD	39843750	rs326655	-111.969	0.3271	0.658619	totalSA	Yes
BD	39843750	rs3862908	135.213	0.2801	0.705585	totalSA	Yes
BD	39843750	rs1325758	105.453	0.3477	0.638046	totalSA	Yes
BD	39843750	rs2477063	-2.7871	0.9837	0.0158799	totalSA	Yes
BD	39843750	rs12083466	64.2877	0.5616	0.427192	totalSA	Yes
BD	39843750	rs2339515	26.0299	0.8164	0.178753	totalSA	Yes
BD	39843750	rs1509392	111.223	0.3141	0.671639	totalSA	Yes
BD	39843750	rs719504	-63.2699	0.5907	0.398729	totalSA	Yes
BD	39843750	rs4274628	-85.1779	0.4624	0.524349	totalSA	Yes
BD	39843750	rs55871458	74.3244	0.5883	0.401051	totalSA	Yes
BD	39843750	rs583168	-33.6749	0.7643	0.229462	totalSA	Yes
BD	39843750	rs3136359	177.818	0.165	0.821201	totalSA	Yes
BD	39843750	rs149002246	-153.574	0.5753	0.413766	totalSA	Yes
BD	39843750	rs17399773	-101.364	0.443	0.543356	totalSA	Yes
BD	39843750	rs1030318	92.7454	0.4143	0.571848	totalSA	Yes
BD	39843750	rs78381888	148.18	0.4005	0.585453	totalSA	Yes
BD	39843750	rs4851134	-148.37	0.2476	0.738121	totalSA	Yes
BD	39843750	rs3792150	-464.135	0.0001358	0.999173	totalSA	Yes
BD	39843750	rs2569963	-87.6682	0.4476	0.538841	totalSA	Yes
BD	39843750	rs7426273	85.9607	0.5565	0.432197	totalSA	Yes
BD	39843750	rs4447623	183.712	0.1432	0.843293	totalSA	Yes
BD	39843750	rs3811038	-261.711	0.03457	0.957071	totalSA	Yes
BD	39843750	rs4608528	-7.3574	0.9544	0.0443162	totalSA	Yes
BD	39843750	rs7578553	237.025	0.03255	0.959253	totalSA	Yes
BD	39843750	rs2357978	-19.1852	0.8725	0.124128	totalSA	Yes
BD	39843750	rs12692625	25.8469	0.8281	0.167348	totalSA	Yes
BD	39843750	rs10490563	-35.5889	0.7717	0.222252	totalSA	Yes
BD	39843750	rs1116173	150.146	0.2565	0.729215	totalSA	Yes
BD	39843750	rs6433891	-171.932	0.1613	0.824972	totalSA	Yes
BD	39843750	rs1429428	199.665	0.09784	0.890188	totalSA	Yes
BD	39843750	rs13404366	203.758	0.08557	0.902872	totalSA	Yes
BD	39843750	rs1025753	206.98	0.08769	0.900643	totalSA	Yes
BD	39843750	rs4674623	-24.3683	0.8304	0.165093	totalSA	Yes
BD	39843750	rs72974238	76.6277	0.5207	0.467174	totalSA	Yes
BD	39843750	rs4143282	-27.5393	0.8233	0.172045	totalSA	Yes
BD	39843750	rs6771524	-59.6513	0.6454	0.345308	totalSA	Yes
BD	39843750	rs6549953	-79.7557	0.4682	0.518677	totalSA	Yes
BD	39843750	rs9834970	51.1207	0.6392	0.351314	totalSA	Yes
BD	39843750	rs1320163	-282.303	0.06206	0.927632	totalSA	Yes
BD	39843750	rs75661790	309.667	0.05265	0.937602	totalSA	Yes
BD	39843750	rs9813415	-118.593	0.3104	0.675339	totalSA	Yes
BD	39843750	rs6441861	-195.599	0.08171	0.906912	totalSA	Yes
BD	39843750	rs12631337	114.415	0.3061	0.679597	totalSA	Yes
BD	39843750	rs12639116	122.424	0.5049	0.482627	totalSA	Yes
BD	39843750	rs34040100	245.239	0.2276	0.75828	totalSA	Yes
BD	39843750	rs62264770	4.5116	0.9766	0.0227996	totalSA	Yes
BD	39843750	rs1456196	-0.4431	0.9977	0.00222524	totalSA	Yes
BD	39843750	rs12485841	-112.529	0.3714	0.614314	totalSA	Yes
BD	39843750	rs10934458	148.5	0.2503	0.735415	totalSA	Yes
BD	39843750	rs1879091	-235.79	0.1096	0.877912	totalSA	Yes
BD	39843750	rs546738	186.174	0.1092	0.878331	totalSA	Yes
BD	39843750	rs9869577	-40.056	0.7269	0.265858	totalSA	Yes
BD	39843750	rs75608688	40.1807	0.8055	0.189368	totalSA	Yes
BD	39843750	rs762855	344.045	0.001905	0.996062	totalSA	Yes
BD	39843750	rs4697446	47.9665	0.6682	0.323149	totalSA	Yes
BD	39843750	rs13353610	16.7374	0.8831	0.113814	totalSA	Yes
BD	39843750	rs10000365	12.6236	0.9117	0.0860378	totalSA	Yes
BD	39843750	rs2651570	49.5935	0.6586	0.332419	totalSA	Yes
BD	39843750	rs2651571	-48.9812	0.6634	0.327806	totalSA	Yes
BD	39843750	rs4863729	-57.9429	0.6065	0.383329	totalSA	Yes
BD	39843750	rs17729514	305.682	0.08907	0.899236	totalSA	Yes
BD	39843750	rs1425523	-340.951	0.03947	0.951786	totalSA	Yes
BD	39843750	rs62340589	41.9897	0.7596	0.234041	totalSA	Yes
BD	39843750	rs72701946	259.585	0.08553	0.902914	totalSA	Yes
BD	39843750	rs1392446	-4.9887	0.9637	0.0352922	totalSA	Yes
BD	39843750	rs16877131	-12.4482	0.9265	0.0716104	totalSA	Yes
BD	39843750	rs40465	196.313	0.1069	0.880704	totalSA	Yes
BD	39843750	rs288179	73.7104	0.5424	0.445978	totalSA	Yes
BD	39843750	rs32253	416.173	0.03851	0.952814	totalSA	Yes
BD	39843750	rs17703995	104.482	0.5337	0.454468	totalSA	Yes
BD	39843750	rs13161666	170.211	0.2589	0.726799	totalSA	Yes
BD	39843750	rs3811996	113.301	0.3369	0.64884	totalSA	Yes
BD	39843750	rs10071347	-400.684	0.0004804	0.998355	totalSA	Yes
BD	39843750	rs73369037	430.116	0.08435	0.904125	totalSA	Yes
BD	39843750	rs112292112	164.633	0.6347	0.355713	totalSA	Yes
BD	39843750	rs2757021	339.926	0.01178	0.982959	totalSA	Yes
BD	39843750	rs2730854	-344.832	0.01057	0.984427	totalSA	Yes
BD	39843750	rs1593652	52.6248	0.6476	0.343153	totalSA	Yes
BD	39843750	rs62420384	275.166	0.4074	0.578679	totalSA	Yes
BD	39843750	rs1487445	264.24	0.01749	0.976192	totalSA	Yes
BD	39843750	rs9375946	-133.964	0.2247	0.761184	totalSA	Yes
BD	39843750	rs17792983	291.842	0.02111	0.971986	totalSA	Yes
BD	39843750	rs6911230	-169.018	0.145	0.84143	totalSA	Yes
BD	39843750	rs73042690	-172.679	0.4144	0.57175	totalSA	Yes
BD	39843750	rs11979128	-20.1942	0.8582	0.138081	totalSA	Yes
BD	39843750	rs78719272	-317.268	0.03998	0.951239	totalSA	Yes
BD	39843750	rs2539968	60.7833	0.6061	0.38371	totalSA	Yes
BD	39843750	rs6954854	-99.5424	0.3672	0.618511	totalSA	Yes
BD	39843750	rs767329	-150.099	0.3661	0.619601	totalSA	Yes
BD	39843750	rs11770210	40.7473	0.7786	0.215572	totalSA	Yes
BD	39843750	rs75621211	-231.965	0.1735	0.812591	totalSA	Yes
BD	39843750	rs3778934	-87.6436	0.444	0.542381	totalSA	Yes
BD	39843750	rs117450257	-117.625	0.6678	0.323532	totalSA	Yes
BD	39843750	rs11765899	573.265	9.809e-07	0.999801	totalSA	Yes
BD	39843750	rs73188321	-282.535	0.04641	0.944281	totalSA	Yes
BD	39843750	rs2189010	35.1839	0.7513	0.242091	totalSA	Yes
BD	39843750	rs10953766	160.489	0.1506	0.835748	totalSA	Yes
BD	39843750	rs71563618	44.1229	0.8072	0.187706	totalSA	Yes
BD	39843750	rs17137753	93.4339	0.3952	0.590736	totalSA	Yes
BD	39843750	rs4386905	-105.66	0.3364	0.649331	totalSA	Yes
BD	39843750	rs34997884	70.1291	0.5545	0.434171	totalSA	Yes
BD	39843750	rs13227429	157.18	0.1769	0.809178	totalSA	Yes
BD	39843750	rs55806395	72.4828	0.5186	0.469216	totalSA	Yes
BD	39843750	rs55669358	-174.626	0.3668	0.618907	totalSA	Yes
BD	39843750	rs4469447	-88.7131	0.4635	0.523285	totalSA	Yes
BD	39843750	rs16916741	-98.0325	0.4367	0.549565	totalSA	Yes
BD	39843750	rs10957165	-50.5589	0.7165	0.276035	totalSA	Yes
BD	39843750	rs10957300	44.7559	0.6822	0.309518	totalSA	Yes
BD	39843750	rs12541158	-160.871	0.1472	0.83919	totalSA	Yes
BD	39843750	rs990132	-378.408	0.004329	0.992495	totalSA	Yes
BD	39843750	rs1392518	-5.5796	0.9681	0.0310212	totalSA	Yes
BD	39843750	rs12685098	-226.576	0.1238	0.863185	totalSA	Yes
BD	39843750	rs1330255	229.896	0.04659	0.944082	totalSA	Yes
BD	39843750	rs4327938	118.173	0.2978	0.687909	totalSA	Yes
BD	39843750	rs565593	-100.357	0.4778	0.509288	totalSA	Yes
BD	39843750	rs542811	-100.021	0.4802	0.506929	totalSA	Yes
BD	39843750	rs13284901	19.8463	0.8585	0.137786	totalSA	Yes
BD	39843750	rs6475111	-59.3298	0.6423	0.348307	totalSA	Yes
BD	39843750	rs56244625	141.806	0.27	0.71573	totalSA	Yes
BD	39843750	rs13301360	-181.907	0.122	0.865054	totalSA	Yes
BD	39843750	rs13302882	188.789	0.1119	0.875538	totalSA	Yes
BD	39843750	rs9408285	-61.4985	0.5807	0.408453	totalSA	Yes
BD	39843750	rs4483247	8.2435	0.9559	0.0428599	totalSA	Yes
BD	39843750	rs7852593	-150.955	0.1798	0.806255	totalSA	Yes
BD	39843750	rs3815563	-222.431	0.1336	0.853123	totalSA	Yes
BD	39843750	rs10491851	-22.6266	0.8529	0.143218	totalSA	Yes
BD	39843750	rs13296664	-22.2534	0.8547	0.141471	totalSA	Yes
BD	39843750	rs10984746	26.587	0.8813	0.115573	totalSA	Yes
BD	39843750	rs10984747	-4.442	0.9806	0.0188895	totalSA	Yes
BD	39843750	rs13300856	-65.8399	0.6775	0.31406	totalSA	Yes
BD	39843750	rs10781533	169.615	0.1714	0.814692	totalSA	Yes
BD	39843750	rs2253422	-27.0802	0.8088	0.186161	totalSA	Yes
BD	39843750	rs2154393	-24.1262	0.906	0.0916073	totalSA	Yes
BD	39843750	rs56015006	110.656	0.3515	0.634219	totalSA	Yes
BD	39843750	rs11001471	-254.162	0.1163	0.870924	totalSA	Yes
BD	39843750	rs61867294	-107.935	0.4301	0.556119	totalSA	Yes
BD	39843750	rs703482	-263.586	0.09208	0.896161	totalSA	Yes
BD	39843750	rs9787575	154.119	0.3099	0.675831	totalSA	Yes
BD	39843750	rs61873575	64.3517	0.6124	0.37758	totalSA	Yes
BD	39843750	rs2585813	16.9651	0.8798	0.117032	totalSA	Yes
BD	39843750	rs10767826	-134.517	0.2628	0.722944	totalSA	Yes
BD	39843750	rs1746942	62.1949	0.5731	0.415926	totalSA	Yes
BD	39843750	rs61885711	64.449	0.8741	0.122588	totalSA	Yes
BD	39843750	rs61882743	-532.263	0.0002237	0.998939	totalSA	Yes
BD	39843750	rs198470	-140.55	0.2298	0.75605	totalSA	Yes
BD	39843750	rs102275	-202.787	0.07633	0.912626	totalSA	Yes
BD	39843750	rs12805133	4.1038	0.9706	0.0286109	totalSA	Yes
BD	39843750	rs7117514	-1.6661	0.9879	0.0117677	totalSA	Yes
BD	39843750	rs1827603	-158.113	0.2539	0.731818	totalSA	Yes
BD	39843750	rs12577012	-360.739	0.002119	0.99575	totalSA	Yes
BD	39843750	rs11218791	82.6016	0.4662	0.520641	totalSA	Yes
BD	39843750	rs609618	87.9004	0.4573	0.529333	totalSA	Yes
BD	39843750	rs598659	88.9595	0.4519	0.534614	totalSA	Yes
BD	39843750	rs2298489	-54.7906	0.6371	0.35336	totalSA	Yes
BD	39843750	rs17601612	88.2313	0.4392	0.547107	totalSA	Yes
BD	39843750	rs4319542	175.32	0.1237	0.863286	totalSA	Yes
BD	39843750	rs67649878	195.017	0.2772	0.70847	totalSA	Yes
BD	39843750	rs4298967	-14.6206	0.8994	0.0979822	totalSA	Yes
BD	39843750	rs78406069	241.198	0.07968	0.909056	totalSA	Yes
BD	39843750	rs7976870	39.3119	0.7243	0.268412	totalSA	Yes
BD	39843750	rs10879804	-258.084	0.07436	0.914689	totalSA	Yes
BD	39843750	rs1179434	-181.974	0.1007	0.887129	totalSA	Yes
BD	39843750	rs55647329	-246.843	0.1206	0.86649	totalSA	Yes
BD	39843750	rs7962128	-17.7765	0.8748	0.121897	totalSA	Yes
BD	39843750	rs7980294	148.329	0.2003	0.785583	totalSA	Yes
BD	39843750	rs9595606	-320.27	0.01528	0.978801	totalSA	Yes
BD	39843750	rs79351007	-146.165	0.3593	0.626409	totalSA	Yes
BD	39843750	rs12584829	-98.9984	0.3814	0.604424	totalSA	Yes
BD	39843750	rs17059996	83.4642	0.6534	0.337481	totalSA	Yes
BD	39843750	rs943710	-101.298	0.3598	0.625903	totalSA	Yes
BD	39843750	rs314690	165.466	0.1536	0.83273	totalSA	Yes
BD	39843750	rs7322790	55.2951	0.6259	0.36436	totalSA	Yes
BD	39843750	rs9554338	77.3458	0.5074	0.480198	totalSA	Yes
BD	39843750	rs35985675	261.531	0.06609	0.923395	totalSA	Yes
BD	39843750	rs2798398	-184.279	0.1187	0.868449	totalSA	Yes
BD	39843750	rs12431576	153.73	0.1934	0.792509	totalSA	Yes
BD	39843750	rs2693698	112.392	0.3202	0.66555	totalSA	Yes
BD	39843750	rs10047805	237.739	0.0497	0.940748	totalSA	Yes
BD	39843750	rs11632852	146.975	0.1767	0.809381	totalSA	Yes
BD	39843750	rs7178343	-145.321	0.2374	0.748359	totalSA	Yes
BD	39843750	rs650366	-304.126	0.01039	0.984644	totalSA	Yes
BD	39843750	rs4404022	-54.1463	0.6387	0.351796	totalSA	Yes
BD	39843750	rs9920550	-183.432	0.2541	0.731617	totalSA	Yes
BD	39843750	rs2879976	59.2185	0.6297	0.360614	totalSA	Yes
BD	39843750	rs2019611	78.035	0.5437	0.44469	totalSA	Yes
BD	39843750	rs28541419	-117.319	0.3936	0.592332	totalSA	Yes
BD	39843750	rs4702	53.7641	0.6342	0.356197	totalSA	Yes
BD	39843750	rs716508	108.209	0.3554	0.630299	totalSA	Yes
BD	39843750	rs12926477	109.944	0.384	0.601825	totalSA	Yes
BD	39843750	rs4456522	-64.6905	0.5982	0.391426	totalSA	Yes
BD	39843750	rs9935387	-29.6823	0.8132	0.181877	totalSA	Yes
BD	39843750	rs142058	130.024	0.4121	0.57406	totalSA	Yes
BD	39843750	rs1095163	-179.568	0.1086	0.878955	totalSA	Yes
BD	39843750	rs9302575	-67.0632	0.5672	0.421697	totalSA	Yes
BD	39843750	rs60740701	-151.989	0.1878	0.798177	totalSA	Yes
BD	39843750	rs7192848	-29.3144	0.7915	0.202969	totalSA	Yes
BD	39843750	rs8057081	-67.1509	0.6081	0.381773	totalSA	Yes
BD	39843750	rs4888526	-53.9948	0.698	0.294169	totalSA	Yes
BD	39843750	rs992269	-190.323	0.1084	0.879156	totalSA	Yes
BD	39843750	rs12932628	-56.6143	0.6551	0.335809	totalSA	Yes
BD	39843750	rs1008362	124.447	0.2521	0.733622	totalSA	Yes
BD	39843750	rs34670005	274.674	0.01889	0.974545	totalSA	Yes
BD	39843750	rs7502233	280.77	0.01763	0.976021	totalSA	Yes
BD	39843750	rs2269905	-166.667	0.1535	0.832834	totalSA	Yes
BD	39843750	rs9304116	307.018	0.1346	0.852087	totalSA	Yes
BD	39843750	rs11082129	-7.072	0.9491	0.049495	totalSA	Yes
BD	39843750	rs17655644	-166.494	0.2748	0.710905	totalSA	Yes
BD	39843750	rs17656030	210.601	0.2139	0.771981	totalSA	Yes
BD	39843750	rs17410557	-122.659	0.2839	0.701801	totalSA	Yes
BD	39843750	rs12967143	15.4152	0.899	0.0983582	totalSA	Yes
BD	39843750	rs7240986	-57.2224	0.6138	0.376207	totalSA	Yes
BD	39843750	rs17090052	-63.1585	0.6202	0.369967	totalSA	Yes
BD	39843750	rs17802226	78.6413	0.4737	0.513306	totalSA	Yes
BD	39843750	rs7248205	-130.715	0.2685	0.71723	totalSA	Yes
BD	39843750	rs12975001	406.688	0.07163	0.917566	totalSA	Yes
BD	39843750	rs16975663	107.221	0.5334	0.454752	totalSA	Yes
BD	39843750	rs73049975	70.9042	0.822	0.173315	totalSA	Yes
BD	39843750	rs10408774	-81.9238	0.4649	0.521925	totalSA	Yes
BD	39843750	rs148108087	343.199	0.2725	0.713219	totalSA	Yes
BD	39843750	rs7257212	131.811	0.2521	0.733622	totalSA	Yes
BD	39843750	rs16995929	-62.5054	0.7425	0.250651	totalSA	Yes
BD	39843750	rs932388	297.385	0.007466	0.988284	totalSA	Yes
BD	39843750	rs6125656	-65.5871	0.6418	0.348786	totalSA	Yes
BD	39843750	rs35277443	-45.0187	0.7384	0.254626	totalSA	Yes
BD	39843750	rs911168	-25.2615	0.8378	0.15794	totalSA	Yes
BD	39843750	rs2009159	480.093	0.02291	0.969944	totalSA	Yes
BD	39843750	rs5994432	-132.116	0.3092	0.676527	totalSA	Yes
BD	39843750	rs9611440	194.939	0.08456	0.903915	totalSA	Yes
BD	39843750	rs9611525	-168.168	0.16	0.826273	totalSA	Yes
MDD	38177345	rs301799	0	0.9994	0.00143136	meanCT	No
MDD	38177345	rs2089358	-0.0004	0.6362	0.357823	meanCT	No
MDD	38177345	rs1466887	0.0013	0.07914	0.912389	meanCT	No
MDD	38177345	rs17105472	0.0008	0.5239	0.469022	meanCT	No
MDD	38177345	rs11579246	-0.001	0.4302	0.562027	meanCT	No
MDD	38177345	rs1890946	-0.0001	0.9104	0.0878934	meanCT	No
MDD	38177345	rs2568960	0.0001	0.8901	0.10769	meanCT	No
MDD	38177345	rs12136984	-0.0006	0.4407	0.55154	meanCT	No
MDD	38177345	rs113188507	0.0001	0.9403	0.0581713	meanCT	No
MDD	38177345	rs10913112	0.0016	0.0588	0.933586	meanCT	No
MDD	38177345	rs72724890	-0.0003	0.828	0.168777	meanCT	No
MDD	38177345	rs169235	0.0009	0.2742	0.716461	meanCT	No
MDD	38177345	rs16841842	0	0.9781	0.0215206	meanCT	No
MDD	38177345	rs4846898	0.0001	0.8923	0.105431	meanCT	No
MDD	38177345	rs1463980	-0.0004	0.5677	0.425763	meanCT	No
MDD	38177345	rs7589705	0.0005	0.7612	0.234568	meanCT	No
MDD	38177345	rs1568452	-0.0013	0.09461	0.896346	meanCT	No
MDD	38177345	rs4852252	-0.0004	0.6088	0.385112	meanCT	No
MDD	38177345	rs7586028	0.0004	0.7012	0.293669	meanCT	No
MDD	38177345	rs2582954	0.0021	0.006475	0.990335	meanCT	No
MDD	38177345	rs1437336	0.0003	0.8321	0.16471	meanCT	No
MDD	38177345	rs1226412	0.0003	0.7344	0.260882	meanCT	No
MDD	38177345	rs1267042	-0.0012	0.1709	0.81906	meanCT	No
MDD	38177345	rs11681373	0.0007	0.3584	0.633128	meanCT	No
MDD	38177345	rs788022	-0.0008	0.2945	0.696342	meanCT	No
MDD	38177345	rs62188629	0.0019	0.02139	0.973124	meanCT	No
MDD	38177345	rs72931605	0.0007	0.5516	0.441844	meanCT	No
MDD	38177345	rs2592105	-0.0004	0.5979	0.396121	meanCT	No
MDD	38177345	rs13319803	-0.0005	0.5377	0.455616	meanCT	No
MDD	38177345	rs13058822	-0.0006	0.459	0.533382	meanCT	No
MDD	38177345	rs9831648	0.0005	0.5549	0.438551	meanCT	No
MDD	38177345	rs7624336	0.0016	0.07874	0.912819	meanCT	No
MDD	38177345	rs843812	-0.0004	0.6175	0.376598	meanCT	No
MDD	38177345	rs9825208	-0.0014	0.05887	0.933519	meanCT	No
MDD	38177345	rs6783233	-0.0008	0.3626	0.629072	meanCT	No
MDD	38177345	rs827120	-0.0003	0.6945	0.300468	meanCT	No
MDD	38177345	rs12635614	-0.0003	0.7436	0.252038	meanCT	No
MDD	38177345	rs3905238	-0.002	0.009952	0.986119	meanCT	No
MDD	38177345	rs34937911	0.0007	0.5295	0.463682	meanCT	No
MDD	38177345	rs10026036	0.0009	0.2259	0.764209	meanCT	No
MDD	38177345	rs45534736	-0.0027	0.1178	0.872657	meanCT	No
MDD	38177345	rs35553410	-0.0011	0.1952	0.794645	meanCT	No
MDD	38177345	rs17611770	-0.0005	0.6265	0.367935	meanCT	No
MDD	38177345	rs6553965	0.0007	0.3607	0.630906	meanCT	No
MDD	38177345	rs12517438	-0.0011	0.1411	0.849148	meanCT	No
MDD	38177345	rs3906401	0	0.9801	0.019644	meanCT	No
MDD	38177345	rs3099439	0.0008	0.2689	0.721656	meanCT	No
MDD	38177345	rs13163336	-0.0013	0.2133	0.776584	meanCT	No
MDD	38177345	rs10061069	0.0001	0.8913	0.106367	meanCT	No
MDD	38177345	rs55649128	0.0002	0.7764	0.219424	meanCT	No
MDD	38177345	rs30266	-0.0001	0.9222	0.0764167	meanCT	No
MDD	38177345	rs2408225	0.0008	0.3026	0.688288	meanCT	No
MDD	38177345	rs11135349	-0.0002	0.8414	0.155593	meanCT	No
MDD	38177345	rs12188010	0.0001	0.9107	0.0876063	meanCT	No
MDD	38177345	rs4980365	0.0012	0.1644	0.825547	meanCT	No
MDD	38177345	rs13204572	0.0023	0.07919	0.912333	meanCT	No
MDD	38177345	rs12525684	0.0023	0.00314	0.994672	meanCT	No
MDD	38177345	rs17737641	-0.001	0.6193	0.374871	meanCT	No
MDD	38177345	rs72839477	0.0032	0.01209	0.983576	meanCT	No
MDD	38177345	rs150027890	0.0014	0.4978	0.49501	meanCT	No
MDD	38177345	rs67981811	-0.0032	0.01129	0.984515	meanCT	No
MDD	38177345	rs422907	-0.0003	0.6573	0.33723	meanCT	No
MDD	38177345	rs9360160	-0.0004	0.6337	0.360256	meanCT	No
MDD	38177345	rs7758630	0.0004	0.5993	0.394511	meanCT	No
MDD	38177345	rs728017	0.0001	0.9097	0.0885405	meanCT	No
MDD	38177345	rs55650481	0.0004	0.7475	0.248346	meanCT	No
MDD	38177345	rs1589738	-0.0004	0.5873	0.406526	meanCT	No
MDD	38177345	rs9479138	-0.0005	0.5139	0.479036	meanCT	No
MDD	38177345	rs9364756	-0.0007	0.4417	0.550268	meanCT	No
MDD	38177345	rs2322702	0.0011	0.1613	0.828676	meanCT	No
MDD	38177345	rs11772627	0.001	0.2757	0.71496	meanCT	No
MDD	38177345	rs2043539	0.0013	0.09928	0.891581	meanCT	No
MDD	38177345	rs61127279	0.0008	0.3172	0.673979	meanCT	No
MDD	38177345	rs57389877	-0.0003	0.7348	0.26051	meanCT	No
MDD	38177345	rs16887442	0.0004	0.633	0.360925	meanCT	No
MDD	38177345	rs58104186	-0.0009	0.2461	0.74435	meanCT	No
MDD	38177345	rs10261857	0.0011	0.1655	0.824452	meanCT	No
MDD	38177345	rs7807677	-0.0008	0.3214	0.669841	meanCT	No
MDD	38177345	rs4728354	0.0001	0.9362	0.0620866	meanCT	No
MDD	38177345	rs67455183	0.0005	0.6655	0.32897	meanCT	No
MDD	38177345	rs10089552	0.0011	0.2644	0.726119	meanCT	No
MDD	38177345	rs34727251	-0.0006	0.4697	0.522982	meanCT	No
MDD	38177345	rs7017108	0.0011	0.1669	0.823041	meanCT	No
MDD	38177345	rs1016165	0.0002	0.813	0.183493	meanCT	No
MDD	38177345	rs7837935	0.0007	0.4719	0.52059	meanCT	No
MDD	38177345	rs6472981	-0.0014	0.1907	0.799162	meanCT	No
MDD	38177345	rs4478545	-0.0008	0.3675	0.624255	meanCT	No
MDD	38177345	rs6470670	0.0005	0.5651	0.42834	meanCT	No
MDD	38177345	rs1354115	0.0001	0.88	0.117435	meanCT	No
MDD	38177345	rs958538	0	0.985	0.0150035	meanCT	No
MDD	38177345	rs10810201	0.0012	0.1135	0.87699	meanCT	No
MDD	38177345	rs3793577	0.0008	0.2716	0.719002	meanCT	No
MDD	38177345	rs10966790	-0.0019	0.1149	0.875508	meanCT	No
MDD	38177345	rs34653192	0.0003	0.7115	0.283546	meanCT	No
MDD	38177345	rs7030813	-0.0011	0.1643	0.825647	meanCT	No
MDD	38177345	rs10973303	0.0005	0.6299	0.364745	meanCT	No
MDD	38177345	rs7023933	0.0013	0.2059	0.78408	meanCT	No
MDD	38177345	rs16909922	-0.0014	0.2666	0.723898	meanCT	No
MDD	38177345	rs2149351	-0.0002	0.8193	0.177352	meanCT	No
MDD	38177345	rs9775587	-0.001	0.2079	0.782077	meanCT	No
MDD	38177345	rs2670139	0.001	0.2479	0.742393	meanCT	No
MDD	38177345	rs10987507	0.0021	0.01479	0.980429	meanCT	No
MDD	38177345	rs3088142	0.0004	0.5933	0.400592	meanCT	No
MDD	38177345	rs61691222	-0.0003	0.7071	0.287971	meanCT	No
MDD	38177345	rs17186548	0.0006	0.4916	0.501038	meanCT	No
MDD	38177345	rs1021363	-0.0005	0.4958	0.496968	meanCT	No
MDD	38177345	rs75122126	0.001	0.734	0.26126	meanCT	No
MDD	38177345	rs111471551	-0.0019	0.2482	0.742094	meanCT	No
MDD	38177345	rs1848393	-0.0005	0.5394	0.453989	meanCT	No
MDD	38177345	rs1806153	-0.0011	0.2511	0.739331	meanCT	No
MDD	38177345	rs145678014	-0.0011	0.58	0.413685	meanCT	No
MDD	38177345	rs3980104	0.0013	0.1148	0.875699	meanCT	No
MDD	38177345	rs2509805	-0.0008	0.3287	0.662841	meanCT	No
MDD	38177345	rs198457	0.0006	0.5689	0.424596	meanCT	No
MDD	38177345	rs102275	0.0033	2.711e-05	0.999728	meanCT	No
MDD	38177345	rs58621819	-0.0004	0.6596	0.334959	meanCT	No
MDD	38177345	rs7117514	0.0011	0.139	0.851286	meanCT	No
MDD	38177345	rs7932640	0.0013	0.08989	0.901175	meanCT	No
MDD	38177345	rs61903989	-0.0006	0.7489	0.246495	meanCT	No
MDD	38177345	rs35023999	-0.0004	0.6129	0.381071	meanCT	No
MDD	38177345	rs7934649	0.0006	0.4286	0.563572	meanCT	No
MDD	38177345	rs7940164	0.0008	0.3595	0.632089	meanCT	No
MDD	38177345	rs2187490	0	0.9966	0.00403026	meanCT	No
MDD	38177345	rs57344483	-0.0006	0.7041	0.290912	meanCT	No
MDD	38177345	rs78337797	-0.0027	0.02163	0.972862	meanCT	No
MDD	38177345	rs2359997	0.0004	0.6381	0.356008	meanCT	No
MDD	38177345	rs61935769	-0.0008	0.3117	0.679263	meanCT	No
MDD	38177345	rs41466449	-0.0008	0.3463	0.644851	meanCT	No
MDD	38177345	rs10774600	0.0006	0.5847	0.409029	meanCT	No
MDD	38177345	rs146791497	-0.003	0.09171	0.899357	meanCT	No
MDD	38177345	rs904628	-0.0004	0.6121	0.381842	meanCT	No
MDD	38177345	rs1409379	0.0005	0.5554	0.43807	meanCT	No
MDD	38177345	rs1343605	0.0009	0.2288	0.761223	meanCT	No
MDD	38177345	rs9592461	-0.0001	0.9176	0.080883	meanCT	No
MDD	38177345	rs9545360	-0.0011	0.2681	0.722422	meanCT	No
MDD	38177345	rs4772087	0.0003	0.73	0.265278	meanCT	No
MDD	38177345	rs61990288	0.0012	0.1039	0.886747	meanCT	No
MDD	38177345	rs2274794	0.0011	0.1492	0.840875	meanCT	No
MDD	38177345	rs1956373	0.0028	0.001089	0.99775	meanCT	No
MDD	38177345	rs1152578	-0.0021	0.007537	0.989006	meanCT	No
MDD	38177345	rs1045430	0.0014	0.06521	0.926975	meanCT	No
MDD	38177345	rs10149470	-0.0022	0.00338	0.994362	meanCT	No
MDD	38177345	rs779	-0.0013	0.2585	0.731959	meanCT	No
MDD	38177345	rs12102100	0.0004	0.6184	0.375735	meanCT	No
MDD	38177345	rs8037355	-0.0005	0.5443	0.448958	meanCT	No
MDD	38177345	rs56059718	0	0.9818	0.0180357	meanCT	No
MDD	38177345	rs34488670	0.0015	0.1159	0.87454	meanCT	No
MDD	38177345	rs74927570	-0.0005	0.6472	0.347177	meanCT	No
MDD	38177345	rs2060337	-0.0007	0.3449	0.646191	meanCT	No
MDD	38177345	rs1038093	0.0008	0.3125	0.678523	meanCT	No
MDD	38177345	rs28541419	0.0009	0.3394	0.651474	meanCT	No
MDD	38177345	rs4702	0.0006	0.4325	0.559526	meanCT	No
MDD	38177345	rs7193263	-0.0005	0.5124	0.480486	meanCT	No
MDD	38177345	rs9925434	-0.0004	0.6342	0.359788	meanCT	No
MDD	38177345	rs7200826	0.0012	0.1661	0.823837	meanCT	No
MDD	38177345	rs56887639	0	0.9945	0.00599126	meanCT	No
MDD	38177345	rs12923444	0	0.9736	0.0258387	meanCT	No
MDD	38177345	rs4785307	-0.0005	0.5117	0.481177	meanCT	No
MDD	38177345	rs11643192	0.0006	0.4606	0.531813	meanCT	No
MDD	38177345	rs11644513	0.0001	0.9417	0.0566903	meanCT	No
MDD	38177345	rs2585399	-0.0015	0.05829	0.934093	meanCT	No
MDD	38177345	rs75581564	-0.0023	0.05634	0.936109	meanCT	No
MDD	38177345	rs387627	0.0003	0.7441	0.251551	meanCT	No
MDD	38177345	rs34165207	-0.0002	0.7857	0.210294	meanCT	No
MDD	38177345	rs12967855	-0.0006	0.4735	0.519054	meanCT	No
MDD	38177345	rs4267411	0.0008	0.3686	0.623127	meanCT	No
MDD	38177345	rs7227069	0.0004	0.5715	0.422049	meanCT	No
MDD	38177345	rs58243949	0.0011	0.2293	0.760763	meanCT	No
MDD	38177345	rs4128242	0.0008	0.3144	0.676681	meanCT	No
MDD	38177345	rs12967143	0.0005	0.521	0.47182	meanCT	No
MDD	38177345	rs1452787	0.002	0.01948	0.975203	meanCT	No
MDD	38177345	rs7241572	0.0005	0.621	0.373212	meanCT	No
MDD	38177345	rs33430	-0.0009	0.2232	0.766828	meanCT	No
MDD	38177345	rs74974231	-0.0004	0.6847	0.310218	meanCT	No
MDD	38177345	rs12624433	0.0001	0.8983	0.0996033	meanCT	No
MDD	38177345	rs6066242	0.0001	0.919	0.0795431	meanCT	No
MDD	38177345	rs6012575	-0.0025	0.001151	0.997648	meanCT	No
MDD	38177345	rs372519	0.0021	0.006925	0.989768	meanCT	No
MDD	38177345	rs5758265	-0.0015	0.07838	0.913199	meanCT	No
MDD	38177345	rs7511013	-0.0009	0.265	0.725529	meanCT	No
MDD	38177345	rs301799	146.075	0.1846	0.801447	totalSA	Yes
MDD	38177345	rs2089358	-79.1473	0.513	0.474724	totalSA	Yes
MDD	38177345	rs1466887	-12.282	0.9127	0.0850604	totalSA	Yes
MDD	38177345	rs17105472	216.921	0.2309	0.75494	totalSA	Yes
MDD	38177345	rs11579246	-253.553	0.1718	0.814286	totalSA	Yes
MDD	38177345	rs1890946	-130.505	0.2362	0.749581	totalSA	Yes
MDD	38177345	rs2568960	80.579	0.4717	0.515246	totalSA	Yes
MDD	38177345	rs12136984	37.4752	0.7351	0.257847	totalSA	Yes
MDD	38177345	rs113188507	-158.104	0.1965	0.789396	totalSA	Yes
MDD	38177345	rs10913112	-13.1363	0.9133	0.0844767	totalSA	Yes
MDD	38177345	rs72724890	-178.491	0.3635	0.622198	totalSA	Yes
MDD	38177345	rs169235	-33.1002	0.793	0.201486	totalSA	Yes
MDD	38177345	rs16841842	-234.294	0.07802	0.910832	totalSA	Yes
MDD	38177345	rs4846898	51.8578	0.6437	0.346967	totalSA	Yes
MDD	38177345	rs1463980	-100.46	0.36	0.625701	totalSA	Yes
MDD	38177345	rs7589705	-303.079	0.2146	0.77129	totalSA	Yes
MDD	38177345	rs1568452	181.621	0.1061	0.881536	totalSA	Yes
MDD	38177345	rs4852252	-180.644	0.1048	0.882869	totalSA	Yes
MDD	38177345	rs7586028	-100.681	0.5006	0.486867	totalSA	Yes
MDD	38177345	rs2582954	-31.5548	0.7825	0.211752	totalSA	Yes
MDD	38177345	rs1437336	186.099	0.3156	0.670139	totalSA	Yes
MDD	38177345	rs1226412	110.067	0.4171	0.569032	totalSA	Yes
MDD	38177345	rs1267042	21.3251	0.86	0.136311	totalSA	Yes
MDD	38177345	rs11681373	-153.759	0.1734	0.812688	totalSA	Yes
MDD	38177345	rs788022	316.755	0.007728	0.987937	totalSA	Yes
MDD	38177345	rs62188629	117.011	0.3366	0.649137	totalSA	Yes
MDD	38177345	rs72931605	32.1703	0.8405	0.155309	totalSA	Yes
MDD	38177345	rs2592105	-20.4241	0.8611	0.135233	totalSA	Yes
MDD	38177345	rs13319803	199.551	0.07543	0.913581	totalSA	Yes
MDD	38177345	rs13058822	-71.1187	0.5488	0.439732	totalSA	Yes
MDD	38177345	rs9831648	145.494	0.2694	0.716339	totalSA	Yes
MDD	38177345	rs7624336	-34.6406	0.7972	0.197442	totalSA	Yes
MDD	38177345	rs843812	13.2552	0.9045	0.0930414	totalSA	Yes
MDD	38177345	rs9825208	173.381	0.1156	0.871655	totalSA	Yes
MDD	38177345	rs6783233	58.9103	0.6326	0.357769	totalSA	Yes
MDD	38177345	rs827120	231.999	0.03453	0.957117	totalSA	Yes
MDD	38177345	rs12635614	-173.739	0.13	0.856824	totalSA	Yes
MDD	38177345	rs3905238	360.795	0.001227	0.997105	totalSA	Yes
MDD	38177345	rs34937911	-69.4458	0.6893	0.302639	totalSA	Yes
MDD	38177345	rs10026036	-95.7383	0.4061	0.579956	totalSA	Yes
MDD	38177345	rs45534736	606.929	0.01379	0.980571	totalSA	Yes
MDD	38177345	rs35553410	57.1565	0.6493	0.34147	totalSA	Yes
MDD	38177345	rs17611770	-57.2807	0.6815	0.310179	totalSA	Yes
MDD	38177345	rs6553965	-93.1108	0.424	0.562172	totalSA	Yes
MDD	38177345	rs12517438	11.874	0.9137	0.0840814	totalSA	Yes
MDD	38177345	rs3906401	90.2446	0.4114	0.574729	totalSA	Yes
MDD	38177345	rs3099439	183.031	0.09993	0.888001	totalSA	Yes
MDD	38177345	rs13163336	78.3669	0.5974	0.392185	totalSA	Yes
MDD	38177345	rs10061069	-58.467	0.6609	0.330221	totalSA	Yes
MDD	38177345	rs55649128	-86.8116	0.4436	0.542769	totalSA	Yes
MDD	38177345	rs30266	-147.634	0.2092	0.77665	totalSA	Yes
MDD	38177345	rs2408225	-106.386	0.3326	0.653116	totalSA	Yes
MDD	38177345	rs11135349	-92.0062	0.4032	0.582819	totalSA	Yes
MDD	38177345	rs12188010	-392.382	0.0006168	0.998117	totalSA	Yes
MDD	38177345	rs4980365	-262.497	0.03652	0.954969	totalSA	Yes
MDD	38177345	rs13204572	50.2869	0.7975	0.197149	totalSA	Yes
MDD	38177345	rs12525684	-93.4138	0.3953	0.590634	totalSA	Yes
MDD	38177345	rs17737641	-345.731	0.2571	0.728609	totalSA	Yes
MDD	38177345	rs72839477	164.56	0.3776	0.608201	totalSA	Yes
MDD	38177345	rs150027890	201.356	0.4862	0.501022	totalSA	Yes
MDD	38177345	rs67981811	-113.119	0.5419	0.446469	totalSA	Yes
MDD	38177345	rs422907	-13.7405	0.9042	0.0933277	totalSA	Yes
MDD	38177345	rs9360160	-117.24	0.2963	0.689413	totalSA	Yes
MDD	38177345	rs7758630	9.1193	0.9357	0.0626192	totalSA	Yes
MDD	38177345	rs728017	-162.691	0.1593	0.826992	totalSA	Yes
MDD	38177345	rs55650481	-177.374	0.3129	0.672838	totalSA	Yes
MDD	38177345	rs1589738	115.757	0.3081	0.67763	totalSA	Yes
MDD	38177345	rs9479138	-143.337	0.225	0.760889	totalSA	Yes
MDD	38177345	rs9364756	24.536	0.8415	0.154352	totalSA	Yes
MDD	38177345	rs2322702	131.157	0.2422	0.743521	totalSA	Yes
MDD	38177345	rs11772627	-261.464	0.06014	0.929651	totalSA	Yes
MDD	38177345	rs2043539	1.355	0.9903	0.00947241	totalSA	Yes
MDD	38177345	rs61127279	-318.39	0.007573	0.988145	totalSA	Yes
MDD	38177345	rs57389877	74.8809	0.5018	0.485682	totalSA	Yes
MDD	38177345	rs16887442	74.4053	0.5019	0.485588	totalSA	Yes
MDD	38177345	rs58104186	13.4447	0.9036	0.0939229	totalSA	Yes
MDD	38177345	rs10261857	11.9883	0.9171	0.0807753	totalSA	Yes
MDD	38177345	rs7807677	47.9355	0.6642	0.327023	totalSA	Yes
MDD	38177345	rs4728354	-136.839	0.2256	0.760284	totalSA	Yes
MDD	38177345	rs67455183	-223.083	0.1571	0.829193	totalSA	Yes
MDD	38177345	rs10089552	172.69	0.2457	0.740005	totalSA	Yes
MDD	38177345	rs34727251	50.6119	0.6731	0.318353	totalSA	Yes
MDD	38177345	rs7017108	-143.072	0.1948	0.791108	totalSA	Yes
MDD	38177345	rs1016165	-243.536	0.03691	0.954547	totalSA	Yes
MDD	38177345	rs7837935	187.027	0.2211	0.764837	totalSA	Yes
MDD	38177345	rs6472981	-68.3806	0.6718	0.319643	totalSA	Yes
MDD	38177345	rs4478545	142.73	0.2414	0.74431	totalSA	Yes
MDD	38177345	rs6470670	76.573	0.5292	0.458837	totalSA	Yes
MDD	38177345	rs1354115	71.3234	0.5311	0.456998	totalSA	Yes
MDD	38177345	rs958538	-200.992	0.1105	0.877002	totalSA	Yes
MDD	38177345	rs10810201	45.0159	0.6879	0.303995	totalSA	Yes
MDD	38177345	rs3793577	12.3577	0.9114	0.0863236	totalSA	Yes
MDD	38177345	rs10966790	-186.917	0.2882	0.697533	totalSA	Yes
MDD	38177345	rs34653192	137.179	0.283	0.702694	totalSA	Yes
MDD	38177345	rs7030813	128.394	0.2583	0.727406	totalSA	Yes
MDD	38177345	rs10973303	48.994	0.7529	0.240532	totalSA	Yes
MDD	38177345	rs7023933	217.213	0.1368	0.849847	totalSA	Yes
MDD	38177345	rs16909922	-676.208	0.0002895	0.998775	totalSA	Yes
MDD	38177345	rs2149351	117.1	0.3625	0.623196	totalSA	Yes
MDD	38177345	rs9775587	-217.338	0.05497	0.935162	totalSA	Yes
MDD	38177345	rs2670139	9.7166	0.9383	0.0600495	totalSA	Yes
MDD	38177345	rs10987507	117.602	0.349	0.636741	totalSA	Yes
MDD	38177345	rs3088142	-58.926	0.5928	0.39668	totalSA	Yes
MDD	38177345	rs61691222	177.736	0.1689	0.817241	totalSA	Yes
MDD	38177345	rs17186548	40.4924	0.7617	0.231985	totalSA	Yes
MDD	38177345	rs1021363	27.3295	0.8107	0.18432	totalSA	Yes
MDD	38177345	rs75122126	119.888	0.7677	0.226159	totalSA	Yes
MDD	38177345	rs111471551	351.65	0.1373	0.849329	totalSA	Yes
MDD	38177345	rs1848393	184.727	0.09686	0.891201	totalSA	Yes
MDD	38177345	rs1806153	-18.8848	0.8881	0.108947	totalSA	Yes
MDD	38177345	rs145678014	-276.103	0.3545	0.631208	totalSA	Yes
MDD	38177345	rs3980104	135.681	0.2452	0.7405	totalSA	Yes
MDD	38177345	rs2509805	-8.8558	0.9417	0.0567132	totalSA	Yes
MDD	38177345	rs198457	-106.784	0.4686	0.518289	totalSA	Yes
MDD	38177345	rs102275	-202.787	0.07633	0.912626	totalSA	Yes
MDD	38177345	rs58621819	-329.541	0.01659	0.977264	totalSA	Yes
MDD	38177345	rs7117514	-1.6661	0.9879	0.0117677	totalSA	Yes
MDD	38177345	rs7932640	-247.66	0.02554	0.967007	totalSA	Yes
MDD	38177345	rs61903989	-90.674	0.7533	0.240143	totalSA	Yes
MDD	38177345	rs35023999	68.5433	0.5313	0.456809	totalSA	Yes
MDD	38177345	rs7934649	-154.617	0.1721	0.813996	totalSA	Yes
MDD	38177345	rs7940164	-247.892	0.04346	0.947466	totalSA	Yes
MDD	38177345	rs2187490	53.2316	0.783	0.211267	totalSA	Yes
MDD	38177345	rs57344483	108.001	0.6097	0.380204	totalSA	Yes
MDD	38177345	rs78337797	11.8086	0.9457	0.0528253	totalSA	Yes
MDD	38177345	rs2359997	-38.8201	0.7687	0.225177	totalSA	Yes
MDD	38177345	rs61935769	75.17	0.5117	0.475999	totalSA	Yes
MDD	38177345	rs41466449	142.113	0.2702	0.715532	totalSA	Yes
MDD	38177345	rs10774600	-496.49	0.001671	0.996412	totalSA	Yes
MDD	38177345	rs146791497	185.33	0.4659	0.520937	totalSA	Yes
MDD	38177345	rs904628	-55.628	0.6278	0.362492	totalSA	Yes
MDD	38177345	rs1409379	-394.603	0.002267	0.995535	totalSA	Yes
MDD	38177345	rs1343605	1.7445	0.9877	0.0119584	totalSA	Yes
MDD	38177345	rs9592461	175.405	0.1063	0.881328	totalSA	Yes
MDD	38177345	rs9545360	-181.306	0.2064	0.779471	totalSA	Yes
MDD	38177345	rs4772087	-83.333	0.4643	0.522501	totalSA	Yes
MDD	38177345	rs61990288	-151.717	0.1671	0.819074	totalSA	Yes
MDD	38177345	rs2274794	-154.949	0.1885	0.797471	totalSA	Yes
MDD	38177345	rs1956373	-40.8181	0.7469	0.246344	totalSA	Yes
MDD	38177345	rs1152578	160.196	0.1518	0.834538	totalSA	Yes
MDD	38177345	rs1045430	234.101	0.03334	0.958402	totalSA	Yes
MDD	38177345	rs10149470	-249.821	0.02615	0.966338	totalSA	Yes
MDD	38177345	rs779	24.0911	0.8909	0.106261	totalSA	Yes
MDD	38177345	rs12102100	122.083	0.278	0.707663	totalSA	Yes
MDD	38177345	rs8037355	-142.371	0.1949	0.791005	totalSA	Yes
MDD	38177345	rs56059718	149.498	0.2922	0.693528	totalSA	Yes
MDD	38177345	rs34488670	-68.739	0.6068	0.383036	totalSA	Yes
MDD	38177345	rs74927570	-598.288	4.463e-05	0.999457	totalSA	Yes
MDD	38177345	rs2060337	-129.227	0.2455	0.740206	totalSA	Yes
MDD	38177345	rs1038093	-118.946	0.2982	0.687516	totalSA	Yes
MDD	38177345	rs28541419	-117.319	0.3936	0.592332	totalSA	Yes
MDD	38177345	rs4702	53.7641	0.6342	0.356197	totalSA	Yes
MDD	38177345	rs7193263	116.175	0.3242	0.661523	totalSA	Yes
MDD	38177345	rs9925434	98.0856	0.382	0.60382	totalSA	Yes
MDD	38177345	rs7200826	-135.607	0.281	0.704684	totalSA	Yes
MDD	38177345	rs56887639	68.1018	0.5784	0.410719	totalSA	Yes
MDD	38177345	rs12923444	-57.5912	0.6069	0.382938	totalSA	Yes
MDD	38177345	rs4785307	-106.554	0.3449	0.640854	totalSA	Yes
MDD	38177345	rs11643192	61.1018	0.5858	0.403489	totalSA	Yes
MDD	38177345	rs11644513	118.865	0.2989	0.686818	totalSA	Yes
MDD	38177345	rs2585399	-144.983	0.2026	0.783245	totalSA	Yes
MDD	38177345	rs75581564	478.577	0.004916	0.991666	totalSA	Yes
MDD	38177345	rs387627	-101.201	0.4103	0.575801	totalSA	Yes
MDD	38177345	rs34165207	-70.1327	0.5248	0.463183	totalSA	Yes
MDD	38177345	rs12967855	-123.57	0.2956	0.69012	totalSA	Yes
MDD	38177345	rs4267411	-202.826	0.1411	0.845462	totalSA	Yes
MDD	38177345	rs7227069	43.2326	0.6944	0.297703	totalSA	Yes
MDD	38177345	rs58243949	27.27	0.8397	0.156089	totalSA	Yes
MDD	38177345	rs4128242	40.7061	0.714	0.278483	totalSA	Yes
MDD	38177345	rs12967143	15.4152	0.899	0.0983582	totalSA	Yes
MDD	38177345	rs1452787	141.458	0.2492	0.736517	totalSA	Yes
MDD	38177345	rs7241572	90.5368	0.5227	0.46522	totalSA	Yes
MDD	38177345	rs33430	203.116	0.07446	0.914588	totalSA	Yes
MDD	38177345	rs74974231	183.172	0.1974	0.788494	totalSA	Yes
MDD	38177345	rs12624433	86.9072	0.4937	0.493632	totalSA	Yes
MDD	38177345	rs6066242	318.862	0.005817	0.990448	totalSA	Yes
MDD	38177345	rs6012575	128.416	0.2455	0.740206	totalSA	Yes
MDD	38177345	rs372519	-151.644	0.1761	0.809977	totalSA	Yes
MDD	38177345	rs5758265	-175.394	0.1652	0.821002	totalSA	Yes
MDD	38177345	rs7511013	276.067	0.02509	0.967499	totalSA	Yes
SCZ	35396580	rs11122119	0.0009	0.2581	0.732357	meanCT	No
SCZ	35396581	rs2252865	-0.0003	0.7297	0.265577	meanCT	No
SCZ	35396582	rs61786047	-0.0022	0.0569	0.935528	meanCT	No
SCZ	35396583	rs56335113	-0.0004	0.6637	0.330742	meanCT	No
SCZ	35396584	rs645383	0.0031	0.03104	0.962767	meanCT	No
SCZ	35396585	rs2970610	0	0.9979	0.00284068	meanCT	No
SCZ	35396586	rs3900555	-0.0011	0.1618	0.828189	meanCT	No
SCZ	35396587	rs6588168	0.0011	0.1418	0.848456	meanCT	No
SCZ	35396588	rs11209828	0.001	0.2005	0.789277	meanCT	No
SCZ	35396589	rs12042444	0.0007	0.3657	0.626035	meanCT	No
SCZ	35396590	rs10157075	-0.0002	0.8252	0.171488	meanCT	No
SCZ	35396591	rs1023330	-0.0002	0.8079	0.188665	meanCT	No
SCZ	35396592	rs61789527	0.001	0.3203	0.670932	meanCT	No
SCZ	35396593	rs4950119	-0.0015	0.117	0.873461	meanCT	No
SCZ	35396594	rs61838368	-0.0012	0.2571	0.733322	meanCT	No
SCZ	35396595	rs12138231	-0.0027	0.006413	0.990409	meanCT	No
SCZ	35396596	rs10559	-0.0009	0.2592	0.73127	meanCT	No
SCZ	35396597	rs61828917	-0.0014	0.2132	0.776698	meanCT	No
SCZ	35396598	rs16851048	-0.0002	0.8559	0.141267	meanCT	No
SCZ	35396599	rs7515363	-0.0011	0.1553	0.83488	meanCT	No
SCZ	35396600	rs12126806	-0.0016	0.05933	0.933061	meanCT	No
SCZ	35396601	rs41314284	0.001	0.4514	0.540854	meanCT	No
SCZ	35396602	rs11587347	0.0024	0.06812	0.923855	meanCT	No
SCZ	35396603	rs345906	-0.0023	0.006869	0.98983	meanCT	No
SCZ	35396604	rs1396728	0.0007	0.3657	0.626035	meanCT	No
SCZ	35396605	rs34181670	0.0003	0.7644	0.231434	meanCT	No
SCZ	35396606	rs3770752	-0.0001	0.8596	0.13767	meanCT	No
SCZ	35396607	rs2139054	0.0017	0.02893	0.964993	meanCT	No
SCZ	35396608	rs4672366	-0.0013	0.1231	0.867215	meanCT	No
SCZ	35396609	rs7599488	0.001	0.1987	0.791223	meanCT	No
SCZ	35396610	rs999494	-0.0002	0.8161	0.180483	meanCT	No
SCZ	35396611	rs6546857	0.0017	0.05008	0.942727	meanCT	No
SCZ	35396612	rs2033996	0.0011	0.2402	0.750153	meanCT	No
SCZ	35396613	rs62152282	-0.0015	0.1201	0.870333	meanCT	No
SCZ	35396614	rs6430491	-0.0004	0.6996	0.295607	meanCT	No
SCZ	35396615	rs12991836	-0.0004	0.614	0.379983	meanCT	No
SCZ	35396616	rs68002929	0.0012	0.2436	0.746766	meanCT	No
SCZ	35396617	rs35026989	-0.0009	0.3291	0.662442	meanCT	No
SCZ	35396618	rs1881046	0.0002	0.7991	0.197054	meanCT	No
SCZ	35396619	rs7604885	0.0006	0.4425	0.549481	meanCT	No
SCZ	35396620	rs62183855	0.0016	0.08407	0.907215	meanCT	No
SCZ	35396621	rs10173857	0	0.9717	0.0276576	meanCT	No
SCZ	35396622	rs11693094	-0.0003	0.729	0.266253	meanCT	No
SCZ	35396623	rs11685270	-0.0003	0.7202	0.275071	meanCT	No
SCZ	35396624	rs2914983	-0.0008	0.3297	0.661849	meanCT	No
SCZ	35396625	rs12471454	0.0024	0.004231	0.993199	meanCT	No
SCZ	35396626	rs11680723	0.0029	0.003476	0.994232	meanCT	No
SCZ	35396627	rs72974238	0.0003	0.7379	0.257486	meanCT	No
SCZ	35396628	rs12476312	0.0005	0.5188	0.474328	meanCT	No
SCZ	35396629	rs778371	0.0003	0.688	0.306988	meanCT	No
SCZ	35396630	rs17194490	-0.0002	0.8297	0.167155	meanCT	No
SCZ	35396631	rs6804677	0.0011	0.1564	0.833783	meanCT	No
SCZ	35396632	rs11129383	-0.0004	0.6626	0.331786	meanCT	No
SCZ	35396633	rs4678552	0.001	0.2056	0.784368	meanCT	No
SCZ	35396634	rs77174383	0	0.991	0.00923802	meanCT	No
SCZ	35396635	rs2710323	0.0026	0.0006223	0.998542	meanCT	No
SCZ	35396636	rs59971314	0.001	0.2427	0.74767	meanCT	No
SCZ	35396637	rs1399551	0.0006	0.4777	0.514944	meanCT	No
SCZ	35396638	rs167924	-0.0015	0.05247	0.940309	meanCT	No
SCZ	35396639	rs10935184	0.0001	0.8805	0.116965	meanCT	No
SCZ	35396640	rs13090130	0	0.9971	0.00356431	meanCT	No
SCZ	35396641	rs7648272	-0.0003	0.7203	0.274979	meanCT	No
SCZ	35396642	rs62291002	0.0009	0.4294	0.562792	meanCT	No
SCZ	35396643	rs71312200	0.0013	0.1739	0.816052	meanCT	No
SCZ	35396644	rs35734242	0	0.9677	0.0315008	meanCT	No
SCZ	35396645	rs59518103	-0.0001	0.9656	0.0334982	meanCT	No
SCZ	35396646	rs215483	-0.0002	0.8433	0.153758	meanCT	No
SCZ	35396647	rs4697446	0.0005	0.5206	0.472194	meanCT	No
SCZ	35396648	rs1454606	0.001	0.4178	0.574212	meanCT	No
SCZ	35396649	rs13117857	-0.0004	0.6582	0.336351	meanCT	No
SCZ	35396650	rs13107325	-0.0076	5.054e-07	0.999891	meanCT	No
SCZ	35396651	rs2905625	0.0002	0.7488	0.24659	meanCT	No
SCZ	35396652	rs28521069	0.0006	0.4329	0.559138	meanCT	No
SCZ	35396653	rs7681616	0.0011	0.1973	0.792582	meanCT	No
SCZ	35396654	rs982012	0.0005	0.4987	0.494147	meanCT	No
SCZ	35396655	rs7699241	-0.002	0.1631	0.826872	meanCT	No
SCZ	35396656	rs61405217	0.0005	0.4795	0.513218	meanCT	No
SCZ	35396657	rs12498839	-0.0004	0.7928	0.203128	meanCT	No
SCZ	35396658	rs72723227	0.0009	0.2586	0.73185	meanCT	No
SCZ	35396659	rs10035564	0.0008	0.2855	0.705363	meanCT	No
SCZ	35396660	rs39967	0.0008	0.403	0.588852	meanCT	No
SCZ	35396661	rs12514660	-0.0005	0.5456	0.447696	meanCT	No
SCZ	35396662	rs7701188	0.0003	0.7599	0.235846	meanCT	No
SCZ	35396663	rs34879738	0.0024	0.005029	0.992138	meanCT	No
SCZ	35396664	rs2914025	0.0015	0.1026	0.888107	meanCT	No
SCZ	35396665	rs252812	0.0014	0.1475	0.842857	meanCT	No
SCZ	35396666	rs11241041	0	0.9992	0.00162141	meanCT	No
SCZ	35396667	rs187653	0.0005	0.5235	0.469417	meanCT	No
SCZ	35396668	rs9687282	-0.0004	0.6105	0.383413	meanCT	No
SCZ	35396669	rs246024	-0.0005	0.5387	0.454657	meanCT	No
SCZ	35396670	rs72802887	0.0015	0.07432	0.917372	meanCT	No
SCZ	35396671	rs815609	0.0014	0.07468	0.917009	meanCT	No
SCZ	35396672	rs12652777	-0.0006	0.3978	0.593948	meanCT	No
SCZ	35396673	rs9470670	0.0014	0.1777	0.812125	meanCT	No
SCZ	35396674	rs140365013	0.0031	0.01168	0.984063	meanCT	No
SCZ	35396675	rs6938026	0.0013	0.1763	0.813685	meanCT	No
SCZ	35396676	rs9341835	0	0.9626	0.0363843	meanCT	No
SCZ	35396677	rs6925079	0.0007	0.365	0.626706	meanCT	No
SCZ	35396678	rs1856507	0.0001	0.867	0.130203	meanCT	No
SCZ	35396679	rs217310	0.0009	0.2509	0.739522	meanCT	No
SCZ	35396680	rs12190758	-0.0006	0.4747	0.51791	meanCT	No
SCZ	35396681	rs117178087	0.0006	0.6838	0.311088	meanCT	No
SCZ	35396682	rs221618	-0.0002	0.7657	0.230156	meanCT	No
SCZ	35396683	rs9398171	0.0003	0.715	0.280136	meanCT	No
SCZ	35396684	rs9487653	0.0017	0.07092	0.920933	meanCT	No
SCZ	35396685	rs7773962	-0.0001	0.9137	0.0847135	meanCT	No
SCZ	35396686	rs9390083	-0.0014	0.179	0.810859	meanCT	No
SCZ	35396687	rs9390172	-0.0021	0.2587	0.731759	meanCT	No
SCZ	35396688	rs9322058	-0.0012	0.1135	0.87699	meanCT	No
SCZ	35396689	rs58120505	-0.0011	0.1573	0.832881	meanCT	No
SCZ	35396690	rs7811528	-0.0009	0.4196	0.572462	meanCT	No
SCZ	35396691	rs2349487	-0.0004	0.6095	0.384436	meanCT	No
SCZ	35396692	rs6461561	0.0005	0.492	0.50065	meanCT	No
SCZ	35396693	rs79210963	0.0027	0.02426	0.970047	meanCT	No
SCZ	35396694	rs3923569	-0.0005	0.5386	0.454748	meanCT	No
SCZ	35396695	rs1589726	0.0003	0.8003	0.195875	meanCT	No
SCZ	35396696	rs35274762	-0.0006	0.5869	0.406903	meanCT	No
SCZ	35396697	rs13233308	0.0001	0.9416	0.0567903	meanCT	No
SCZ	35396698	rs2299409	0.0031	4.773e-05	0.999645	meanCT	No
SCZ	35396699	rs2057884	-0.0012	0.1235	0.866845	meanCT	No
SCZ	35396700	rs7807720	0.0016	0.03345	0.96024	meanCT	No
SCZ	35396701	rs7803571	0	0.9702	0.0291083	meanCT	No
SCZ	35396702	rs62479287	-0.0002	0.7803	0.215583	meanCT	No
SCZ	35396703	rs1593304	0.0017	0.09696	0.893939	meanCT	No
SCZ	35396704	rs35531336	0.0002	0.8413	0.155688	meanCT	No
SCZ	35396705	rs7779548	-0.0008	0.3171	0.67407	meanCT	No
SCZ	35396706	rs10243922	0	0.9712	0.0281389	meanCT	No
SCZ	35396707	rs6946576	-0.001	0.2542	0.736298	meanCT	No
SCZ	35396708	rs12671608	0.0011	0.3333	0.658428	meanCT	No
SCZ	35396709	rs6989793	-0.0001	0.8671	0.130109	meanCT	No
SCZ	35396710	rs876983	0.0004	0.6425	0.351727	meanCT	No
SCZ	35396711	rs73219806	0.0032	0.001812	0.99659	meanCT	No
SCZ	35396712	rs73229090	-0.0001	0.9593	0.039569	meanCT	No
SCZ	35396713	rs79445414	0.0012	0.5317	0.461562	meanCT	No
SCZ	35396714	rs59498392	-0.0018	0.03783	0.955577	meanCT	No
SCZ	35396715	rs6471815	0.0017	0.03137	0.96243	meanCT	No
SCZ	35396716	rs298216	0.0004	0.7322	0.263038	meanCT	No
SCZ	35396717	rs4043663	0.0003	0.7074	0.287688	meanCT	No
SCZ	35396718	rs1434281	0.0006	0.4338	0.558192	meanCT	No
SCZ	35396719	rs10086619	-0.0013	0.2166	0.773341	meanCT	No
SCZ	35396720	rs4129585	-0.0004	0.5599	0.433711	meanCT	No
SCZ	35396721	rs7464611	-0.0017	0.02579	0.968407	meanCT	No
SCZ	35396722	rs2890914	-0.0017	0.02904	0.964869	meanCT	No
SCZ	35396723	rs498591	-0.0014	0.1773	0.812512	meanCT	No
SCZ	35396724	rs505061	-0.0004	0.5806	0.4131	meanCT	No
SCZ	35396725	rs2381411	0.0002	0.7506	0.244884	meanCT	No
SCZ	35396726	rs10781248	0.0005	0.515	0.47798	meanCT	No
SCZ	35396727	rs1319017	-0.0009	0.2315	0.758659	meanCT	No
SCZ	35396728	rs6479494	0.0014	0.1802	0.809666	meanCT	No
SCZ	35396729	rs10985811	0.0004	0.6725	0.322146	meanCT	No
SCZ	35396730	rs13293831	-0.0026	0.0185	0.976301	meanCT	No
SCZ	35396731	rs6478858	-0.0001	0.9457	0.0527653	meanCT	No
SCZ	35396732	rs72761691	0.0013	0.2488	0.741527	meanCT	No
SCZ	35396733	rs17731	0.0016	0.03331	0.960388	meanCT	No
SCZ	35396734	rs7893279	0.0009	0.4361	0.55595	meanCT	No
SCZ	35396735	rs2119242	0	0.9643	0.0347478	meanCT	No
SCZ	35396736	rs2812599	-0.0003	0.8045	0.191868	meanCT	No
SCZ	35396737	rs10995239	-0.0001	0.908	0.0902366	meanCT	No
SCZ	35396738	rs61857878	-0.002	0.02791	0.966092	meanCT	No
SCZ	35396739	rs12571643	-0.0031	0.01882	0.975942	meanCT	No
SCZ	35396740	rs7900775	-0.0005	0.549	0.444369	meanCT	No
SCZ	35396741	rs7902292	-0.0029	0.003673	0.993963	meanCT	No
SCZ	35396742	rs4923457	0.0002	0.8035	0.192825	meanCT	No
SCZ	35396743	rs10767735	-0.0016	0.04015	0.953156	meanCT	No
SCZ	35396744	rs2902858	0.002	0.05047	0.942319	meanCT	No
SCZ	35396745	rs708228	-0.0006	0.4473	0.544867	meanCT	No
SCZ	35396746	rs11227250	-0.0001	0.8529	0.144172	meanCT	No
SCZ	35396747	rs12224032	0.003	0.001627	0.996887	meanCT	No
SCZ	35396748	rs61902811	-0.0007	0.3798	0.611946	meanCT	No
SCZ	35396749	rs77502336	-0.0001	0.8862	0.11137	meanCT	No
SCZ	35396750	rs12282735	-0.0003	0.7359	0.259422	meanCT	No
SCZ	35396751	rs12541	-0.001	0.2646	0.725905	meanCT	No
SCZ	35396752	rs10894308	-0.0009	0.2542	0.736298	meanCT	No
SCZ	35396753	rs3016384	-0.001	0.1824	0.80743	meanCT	No
SCZ	35396754	rs4936215	-0.001	0.2899	0.700944	meanCT	No
SCZ	35396755	rs893949	-0.0012	0.112	0.878547	meanCT	No
SCZ	35396756	rs4298967	-0.0009	0.2375	0.752778	meanCT	No
SCZ	35396757	rs11064369	-0.0011	0.1574	0.832782	meanCT	No
SCZ	35396758	rs302317	-0.0015	0.0545	0.937991	meanCT	No
SCZ	35396759	rs1463209	-0.0006	0.4395	0.552666	meanCT	No
SCZ	35396760	rs578470	0	0.9997	0.00113852	meanCT	No
SCZ	35396761	rs61928076	-0.0019	0.4595	0.532897	meanCT	No
SCZ	35396762	rs61937595	-0.0016	0.2835	0.707346	meanCT	No
SCZ	35396763	rs61924144	0.0008	0.5445	0.448757	meanCT	No
SCZ	35396764	rs12315638	-0.0004	0.5804	0.413301	meanCT	No
SCZ	35396765	rs10777187	-0.0012	0.2003	0.789472	meanCT	No
SCZ	35396766	rs6538539	0.0002	0.7983	0.197817	meanCT	No
SCZ	35396767	rs513022	-0.0004	0.6592	0.335351	meanCT	No
SCZ	35396768	rs10861176	0.002	0.01838	0.976428	meanCT	No
SCZ	35396769	rs3764002	0.002	0.02072	0.973865	meanCT	No
SCZ	35396770	rs4766428	-0.0001	0.8978	0.100079	meanCT	No
SCZ	35396771	rs2649999	0.0011	0.1716	0.818384	meanCT	No
SCZ	35396772	rs2686386	0.0005	0.5929	0.400969	meanCT	No
SCZ	35396773	rs61952922	0	0.9557	0.0430287	meanCT	No
SCZ	35396774	rs1790135	0.0014	0.1827	0.807143	meanCT	No
SCZ	35396775	rs1924378	0.0016	0.03829	0.955094	meanCT	No
SCZ	35396776	rs650520	0	0.9488	0.0497437	meanCT	No
SCZ	35396777	rs9603649	-0.0001	0.9438	0.0546683	meanCT	No
SCZ	35396778	rs11619756	-0.0014	0.07476	0.916931	meanCT	No
SCZ	35396779	rs1545660	-0.0004	0.6989	0.296251	meanCT	No
SCZ	35396780	rs9597388	0.0011	0.239	0.751282	meanCT	No
SCZ	35396781	rs9569820	-0.0006	0.6425	0.351727	meanCT	No
SCZ	35396782	rs12877581	0.0001	0.868	0.129264	meanCT	No
SCZ	35396783	rs9545047	0.0014	0.07065	0.921225	meanCT	No
SCZ	35396784	rs61973697	-0.001	0.2699	0.720706	meanCT	No
SCZ	35396785	rs10148671	-0.0004	0.6284	0.36617	meanCT	No
SCZ	35396786	rs17571951	0.0002	0.8434	0.153666	meanCT	No
SCZ	35396787	rs12883788	0.0008	0.2697	0.720897	meanCT	No
SCZ	35396788	rs221902	0.0002	0.7655	0.230353	meanCT	No
SCZ	35396789	rs2190873	0.0017	0.02961	0.964262	meanCT	No
SCZ	35396790	rs4903718	-0.0006	0.4441	0.54797	meanCT	No
SCZ	35396791	rs7141857	-0.0005	0.547	0.446259	meanCT	No
SCZ	35396792	rs745467	0.0021	0.1584	0.831734	meanCT	No
SCZ	35396793	rs10873538	-0.0015	0.07491	0.916782	meanCT	No
SCZ	35396794	rs2917627	0.0025	0.01603	0.979	meanCT	No
SCZ	35396795	rs56282503	0	0.9635	0.0355168	meanCT	No
SCZ	35396796	rs2929278	0.0002	0.8355	0.161429	meanCT	No
SCZ	35396797	rs653765	0.0023	0.006756	0.989964	meanCT	No
SCZ	35396798	rs11632947	0.0005	0.509	0.483815	meanCT	No
SCZ	35396799	rs3813567	0.0003	0.7911	0.205058	meanCT	No
SCZ	35396800	rs10906984	-0.0001	0.9016	0.096437	meanCT	No
SCZ	35396801	rs11638554	0.0004	0.6404	0.353753	meanCT	No
SCZ	35396802	rs4702	0.0006	0.4325	0.559526	meanCT	No
SCZ	35396803	rs79478621	0.0009	0.6761	0.318604	meanCT	No
SCZ	35396804	rs9674103	-0.0001	0.9458	0.0526717	meanCT	No
SCZ	35396805	rs12925872	0.0006	0.5143	0.478656	meanCT	No
SCZ	35396806	rs9925915	-0.0009	0.2481	0.742197	meanCT	No
SCZ	35396807	rs11862968	-0.002	0.03686	0.956576	meanCT	No
SCZ	35396808	rs11647188	0	0.9832	0.0167279	meanCT	No
SCZ	35396809	rs11076631	-0.0003	0.7374	0.258002	meanCT	No
SCZ	35396810	rs75329315	-0.003	0.02838	0.965596	meanCT	No
SCZ	35396811	rs12943566	-0.0013	0.0838	0.907493	meanCT	No
SCZ	35396812	rs2189336	-0.0004	0.6221	0.372148	meanCT	No
SCZ	35396813	rs959071	0.0005	0.6727	0.321944	meanCT	No
SCZ	35396814	rs11263770	-0.0019	0.01256	0.98301	meanCT	No
SCZ	35396815	rs4793888	-0.0005	0.6082	0.385698	meanCT	No
SCZ	35396816	rs6504163	0	0.9639	0.0351375	meanCT	No
SCZ	35396817	rs7225476	-0.0004	0.5628	0.430944	meanCT	No
SCZ	35396818	rs8096175	-0.0001	0.9201	0.0784493	meanCT	No
SCZ	35396819	rs11083369	-0.0008	0.377	0.614805	meanCT	No
SCZ	35396820	rs8084351	-0.0004	0.5881	0.405701	meanCT	No
SCZ	35396821	rs9636107	0.0009	0.2532	0.737275	meanCT	No
SCZ	35396822	rs715170	-0.0004	0.6322	0.361693	meanCT	No
SCZ	35396823	rs337718	0.0008	0.319	0.672224	meanCT	No
SCZ	35396824	rs55858161	0.0012	0.1589	0.831252	meanCT	No
SCZ	35396825	rs322124	0.0012	0.2124	0.777465	meanCT	No
SCZ	35396826	rs72986630	-0.0005	0.7743	0.221419	meanCT	No
SCZ	35396827	rs8101499	-0.0008	0.3194	0.671812	meanCT	No
SCZ	35396828	rs3810450	0.0027	0.1963	0.793564	meanCT	No
SCZ	35396829	rs7251	0.0005	0.5506	0.442821	meanCT	No
SCZ	35396830	rs2387414	-0.001	0.2286	0.761411	meanCT	No
SCZ	35396831	rs758749	-0.0008	0.4873	0.505321	meanCT	No
SCZ	35396832	rs1006945	0.0001	0.9377	0.0606666	meanCT	No
SCZ	35396833	rs6125656	-0.0009	0.3586	0.632947	meanCT	No
SCZ	35396834	rs229362	-0.0008	0.41	0.581937	meanCT	No
SCZ	35396835	rs732381	-0.0008	0.3763	0.615499	meanCT	No
SCZ	35396836	rs9607782	-0.0012	0.2078	0.782174	meanCT	No
SCZ	35396837	rs76365544	-0.0012	0.6806	0.314153	meanCT	No
SCZ	35396838	rs6010045	-0.0008	0.3341	0.657667	meanCT	No
SCZ	35396839	rs11122119	-146.092	0.2106	0.775257	totalSA	No
SCZ	35396840	rs2252865	27.2366	0.8126	0.182468	totalSA	No
SCZ	35396841	rs61786047	261.538	0.119	0.868149	totalSA	No
SCZ	35396842	rs56335113	-58.9824	0.622	0.368204	totalSA	No
SCZ	35396843	rs645383	-424.138	0.04102	0.950125	totalSA	No
SCZ	35396844	rs2970610	-284.521	0.01424	0.980023	totalSA	No
SCZ	35396845	rs3900555	172.252	0.1155	0.871761	totalSA	No
SCZ	35396846	rs6588168	122.486	0.2652	0.720522	totalSA	No
SCZ	35396847	rs11209828	26.2797	0.8185	0.176717	totalSA	No
SCZ	35396848	rs12042444	101.633	0.3672	0.618511	totalSA	No
SCZ	35396849	rs10157075	-32.5631	0.8151	0.180012	totalSA	No
SCZ	35396850	rs1023330	43.0084	0.7077	0.284635	totalSA	No
SCZ	35396851	rs61789527	-197.709	0.1675	0.818658	totalSA	No
SCZ	35396852	rs4950119	-21.3054	0.8777	0.119077	totalSA	No
SCZ	35396853	rs61838368	156.399	0.317	0.668754	totalSA	No
SCZ	35396854	rs12138231	2.3774	0.987	0.012656	totalSA	No
SCZ	35396855	rs10559	25.4969	0.8302	0.165297	totalSA	No
SCZ	35396856	rs61828917	44.5477	0.7878	0.20657	totalSA	No
SCZ	35396857	rs16851048	84.6153	0.5375	0.450744	totalSA	No
SCZ	35396858	rs7515363	24.4222	0.8302	0.165297	totalSA	No
SCZ	35396859	rs12126806	-64.609	0.5895	0.399876	totalSA	No
SCZ	35396860	rs41314284	129.619	0.4986	0.48882	totalSA	No
SCZ	35396861	rs11587347	-119.688	0.5303	0.457774	totalSA	No
SCZ	35396862	rs345906	-85.2052	0.4798	0.507326	totalSA	No
SCZ	35396863	rs1396728	-97.1485	0.3774	0.608402	totalSA	No
SCZ	35396864	rs34181670	-141.809	0.2836	0.702113	totalSA	No
SCZ	35396865	rs3770752	216.948	0.06622	0.923258	totalSA	No
SCZ	35396866	rs2139054	-93.8034	0.3997	0.586258	totalSA	No
SCZ	35396867	rs4672366	249.877	0.0462	0.944506	totalSA	No
SCZ	35396868	rs7599488	106.689	0.3341	0.651609	totalSA	No
SCZ	35396869	rs999494	172.406	0.2091	0.776755	totalSA	No
SCZ	35396870	rs6546857	-215.902	0.09585	0.892257	totalSA	No
SCZ	35396871	rs2033996	220.996	0.09766	0.890375	totalSA	No
SCZ	35396872	rs62152282	53.4258	0.7062	0.286105	totalSA	No
SCZ	35396873	rs6430491	-185.241	0.1794	0.806656	totalSA	No
SCZ	35396874	rs12991836	-72.3552	0.5258	0.462194	totalSA	No
SCZ	35396875	rs68002929	25.9966	0.8662	0.130254	totalSA	No
SCZ	35396876	rs35026989	-321.32	0.01629	0.977626	totalSA	No
SCZ	35396877	rs1881046	55.9552	0.629	0.361309	totalSA	No
SCZ	35396878	rs7604885	44.0751	0.6875	0.304388	totalSA	No
SCZ	35396879	rs62183855	-45.013	0.7474	0.245862	totalSA	No
SCZ	35396880	rs10173857	145.663	0.2313	0.754545	totalSA	No
SCZ	35396881	rs11693094	48.4222	0.6669	0.324403	totalSA	No
SCZ	35396882	rs11685270	-243.317	0.02931	0.962827	totalSA	No
SCZ	35396883	rs2914983	325.848	0.006635	0.989368	totalSA	No
SCZ	35396884	rs12471454	42.014	0.7246	0.268118	totalSA	No
SCZ	35396885	rs11680723	3.4047	0.9815	0.0180139	totalSA	No
SCZ	35396886	rs72974238	76.6277	0.5207	0.467174	totalSA	No
SCZ	35396887	rs12476312	214.317	0.06578	0.923716	totalSA	No
SCZ	35396888	rs778371	166.618	0.1801	0.805954	totalSA	No
SCZ	35396889	rs17194490	1.484	0.992	0.00781466	totalSA	No
SCZ	35396890	rs6804677	77.6252	0.4809	0.506247	totalSA	No
SCZ	35396891	rs11129383	-154.912	0.2091	0.776755	totalSA	No
SCZ	35396892	rs4678552	1.3099	0.9911	0.00868678	totalSA	No
SCZ	35396893	rs77174383	96.8504	0.5315	0.456616	totalSA	No
SCZ	35396894	rs2710323	53.7839	0.6243	0.365941	totalSA	No
SCZ	35396895	rs59971314	-50.4872	0.6757	0.315805	totalSA	No
SCZ	35396896	rs1399551	-150.38	0.1965	0.789396	totalSA	No
SCZ	35396897	rs167924	295.564	0.008839	0.986549	totalSA	No
SCZ	35396898	rs10935184	-142.256	0.1978	0.788083	totalSA	No
SCZ	35396899	rs13090130	-186.599	0.09802	0.890006	totalSA	No
SCZ	35396900	rs7648272	-10.9498	0.9354	0.0629184	totalSA	No
SCZ	35396901	rs62291002	-154.057	0.3359	0.64982	totalSA	No
SCZ	35396902	rs71312200	89.3987	0.524	0.463949	totalSA	No
SCZ	35396903	rs35734242	46.7706	0.6895	0.302441	totalSA	No
SCZ	35396904	rs59518103	637.192	0.01081	0.984135	totalSA	No
SCZ	35396905	rs215483	62.4325	0.5898	0.399591	totalSA	No
SCZ	35396906	rs4697446	47.9665	0.6682	0.323149	totalSA	No
SCZ	35396907	rs1454606	68.2159	0.6982	0.293973	totalSA	No
SCZ	35396908	rs13117857	-286.226	0.02983	0.962252	totalSA	No
SCZ	35396909	rs13107325	976.219	9.988e-06	0.99966	totalSA	No
SCZ	35396910	rs2905625	196.287	0.07718	0.911729	totalSA	No
SCZ	35396911	rs28521069	82.5057	0.4804	0.506733	totalSA	No
SCZ	35396912	rs7681616	301.494	0.01865	0.974824	totalSA	No
SCZ	35396913	rs982012	-48.9611	0.6547	0.336203	totalSA	No
SCZ	35396914	rs7699241	133.96	0.5122	0.475505	totalSA	No
SCZ	35396915	rs61405217	-67.6093	0.537	0.45124	totalSA	No
SCZ	35396916	rs12498839	96.2867	0.6815	0.310179	totalSA	No
SCZ	35396917	rs72723227	-89.3909	0.4492	0.537254	totalSA	No
SCZ	35396918	rs10035564	-43.7614	0.7095	0.282859	totalSA	No
SCZ	35396919	rs39967	18.0955	0.8986	0.0987438	totalSA	No
SCZ	35396920	rs12514660	61.0128	0.5972	0.392376	totalSA	No
SCZ	35396921	rs7701188	60.4629	0.7107	0.281679	totalSA	No
SCZ	35396922	rs34879738	199.33	0.09449	0.893654	totalSA	No
SCZ	35396923	rs2914025	-79.2191	0.5654	0.42345	totalSA	No
SCZ	35396924	rs252812	25.3169	0.8582	0.138081	totalSA	No
SCZ	35396925	rs11241041	28.1387	0.8486	0.1474	totalSA	No
SCZ	35396926	rs187653	-76.257	0.498	0.489414	totalSA	No
SCZ	35396927	rs9687282	21.7955	0.8521	0.143992	totalSA	No
SCZ	35396928	rs246024	52.2504	0.6363	0.35414	totalSA	No
SCZ	35396929	rs72802887	43.5194	0.715	0.277502	totalSA	No
SCZ	35396930	rs815609	75.0093	0.5046	0.482928	totalSA	No
SCZ	35396931	rs12652777	-72.2814	0.5051	0.482431	totalSA	No
SCZ	35396932	rs9470670	60.857	0.6789	0.312716	totalSA	No
SCZ	35396933	rs140365013	237.497	0.1934	0.792509	totalSA	No
SCZ	35396934	rs6938026	-90.1829	0.5041	0.483423	totalSA	No
SCZ	35396935	rs9341835	10.1143	0.9283	0.0698597	totalSA	No
SCZ	35396936	rs6925079	226.374	0.05348	0.936733	totalSA	No
SCZ	35396937	rs1856507	-104.507	0.3574	0.628311	totalSA	No
SCZ	35396938	rs217310	-267.37	0.01507	0.979057	totalSA	No
SCZ	35396939	rs12190758	-74.9041	0.5525	0.436135	totalSA	No
SCZ	35396940	rs117178087	-426.127	0.05002	0.9404	totalSA	No
SCZ	35396941	rs221618	-8.1628	0.9443	0.0541672	totalSA	No
SCZ	35396942	rs9398171	629.058	1.42e-07	0.999856	totalSA	No
SCZ	35396943	rs9487653	148.128	0.2662	0.719522	totalSA	No
SCZ	35396944	rs7773962	124.318	0.3092	0.676527	totalSA	No
SCZ	35396945	rs9390083	-319.437	0.02932	0.962816	totalSA	No
SCZ	35396946	rs9390172	365.975	0.1798	0.806255	totalSA	No
SCZ	35396947	rs9322058	197.718	0.07542	0.913591	totalSA	No
SCZ	35396948	rs58120505	-317.853	0.004528	0.992212	totalSA	No
SCZ	35396949	rs7811528	-283.939	0.06562	0.923877	totalSA	No
SCZ	35396950	rs2349487	138.428	0.2405	0.745239	totalSA	No
SCZ	35396951	rs6461561	143.71	0.2278	0.758074	totalSA	No
SCZ	35396952	rs79210963	-185.35	0.2814	0.704286	totalSA	No
SCZ	35396953	rs3923569	14.6683	0.903	0.0945009	totalSA	No
SCZ	35396954	rs1589726	-157.087	0.4239	0.562274	totalSA	No
SCZ	35396955	rs35274762	34.8158	0.8319	0.163653	totalSA	No
SCZ	35396956	rs13233308	-98.1479	0.375	0.610775	totalSA	No
SCZ	35396957	rs2299409	-401.466	0.000257	0.998857	totalSA	No
SCZ	35396958	rs2057884	537.85	3.713e-06	0.999745	totalSA	No
SCZ	35396959	rs7807720	-14.1833	0.8996	0.0977832	totalSA	No
SCZ	35396960	rs7803571	-79.6553	0.4812	0.505949	totalSA	No
SCZ	35396961	rs62479287	-132.672	0.2918	0.693926	totalSA	No
SCZ	35396962	rs1593304	-108.112	0.4478	0.53865	totalSA	No
SCZ	35396963	rs35531336	-49.7971	0.7675	0.226356	totalSA	No
SCZ	35396964	rs7779548	124.742	0.2775	0.708161	totalSA	No
SCZ	35396965	rs10243922	-195.989	0.09745	0.890588	totalSA	No
SCZ	35396966	rs6946576	34.139	0.7956	0.198976	totalSA	No
SCZ	35396967	rs12671608	-103.898	0.5397	0.448605	totalSA	No
SCZ	35396968	rs6989793	-75.8975	0.5505	0.438071	totalSA	No
SCZ	35396969	rs876983	33.683	0.7586	0.235027	totalSA	No
SCZ	35396970	rs73219806	-261.371	0.08153	0.9071	totalSA	No
SCZ	35396971	rs73229090	-74.3689	0.6735	0.317965	totalSA	No
SCZ	35396972	rs79445414	-570.576	0.03909	0.952189	totalSA	No
SCZ	35396973	rs59498392	118.228	0.3643	0.621407	totalSA	No
SCZ	35396974	rs6471815	-149.265	0.1788	0.807272	totalSA	No
SCZ	35396975	rs298216	-333.237	0.0732	0.915918	totalSA	No
SCZ	35396976	rs4043663	-145.441	0.2558	0.729921	totalSA	No
SCZ	35396977	rs1434281	11.0446	0.9227	0.0752796	totalSA	No
SCZ	35396978	rs10086619	134.276	0.3679	0.617812	totalSA	No
SCZ	35396979	rs4129585	-145.773	0.194	0.791926	totalSA	No
SCZ	35396980	rs7464611	91.4715	0.4174	0.568736	totalSA	No
SCZ	35396981	rs2890914	-112.959	0.3035	0.682207	totalSA	No
SCZ	35396982	rs498591	85.8557	0.5819	0.407272	totalSA	No
SCZ	35396983	rs505061	14.4196	0.8946	0.102666	totalSA	No
SCZ	35396984	rs2381411	-138.098	0.23	0.755851	totalSA	No
SCZ	35396985	rs10781248	111.264	0.3322	0.653525	totalSA	No
SCZ	35396986	rs1319017	20.5678	0.8607	0.135622	totalSA	No
SCZ	35396987	rs6479494	262.516	0.09323	0.894965	totalSA	No
SCZ	35396988	rs10985811	42.7452	0.7742	0.219822	totalSA	No
SCZ	35396989	rs13293831	-141.406	0.3637	0.621999	totalSA	No
SCZ	35396990	rs6478858	41.4329	0.8688	0.127719	totalSA	No
SCZ	35396991	rs72761691	-114.94	0.4807	0.506445	totalSA	No
SCZ	35396992	rs17731	-79.4197	0.4913	0.496007	totalSA	No
SCZ	35396993	rs7893279	-50.3795	0.7722	0.221779	totalSA	No
SCZ	35396994	rs2119242	-98.9319	0.5375	0.450744	totalSA	No
SCZ	35396995	rs2812599	-39.1014	0.8209	0.174391	totalSA	No
SCZ	35396996	rs10995239	37.8321	0.7371	0.255885	totalSA	No
SCZ	35396997	rs61857878	-219.327	0.09668	0.891381	totalSA	No
SCZ	35396998	rs12571643	111.265	0.5689	0.420017	totalSA	No
SCZ	35396999	rs7900775	47.8233	0.6718	0.319643	totalSA	No
SCZ	35397000	rs7902292	128.447	0.3787	0.607121	totalSA	No
SCZ	35397001	rs4923457	156.344	0.2443	0.741407	totalSA	No
SCZ	35397002	rs10767735	-18.1646	0.8711	0.125475	totalSA	No
SCZ	35397003	rs2902858	-527.825	0.000263	0.998841	totalSA	No
SCZ	35397004	rs708228	-53.1949	0.6491	0.34167	totalSA	No
SCZ	35397005	rs11227250	-100.346	0.3816	0.604225	totalSA	No
SCZ	35397006	rs12224032	-249.421	0.07317	0.915948	totalSA	No
SCZ	35397007	rs61902811	156.637	0.1669	0.81928	totalSA	No
SCZ	35397008	rs77502336	-12.2781	0.9161	0.0817511	totalSA	No
SCZ	35397009	rs12282735	97.1666	0.3775	0.608297	totalSA	No
SCZ	35397010	rs12541	103.325	0.4309	0.555333	totalSA	No
SCZ	35397011	rs10894308	10.3715	0.9256	0.072474	totalSA	No
SCZ	35397012	rs3016384	94.4786	0.3917	0.59422	totalSA	No
SCZ	35397013	rs4936215	-187.628	0.1696	0.816533	totalSA	No
SCZ	35397014	rs893949	20.9237	0.8512	0.144866	totalSA	No
SCZ	35397015	rs4298967	-14.6206	0.8994	0.0979822	totalSA	No
SCZ	35397016	rs11064369	37.9695	0.7444	0.248786	totalSA	No
SCZ	35397017	rs302317	128.086	0.2615	0.724243	totalSA	No
SCZ	35397018	rs1463209	93.1429	0.4017	0.584273	totalSA	No
SCZ	35397019	rs578470	-117.899	0.298	0.68771	totalSA	No
SCZ	35397020	rs61928076	-189.508	0.6043	0.385466	totalSA	No
SCZ	35397021	rs61937595	-164.982	0.4535	0.53305	totalSA	No
SCZ	35397022	rs61924144	-144.387	0.4339	0.55234	totalSA	No
SCZ	35397023	rs12315638	195.549	0.09008	0.898215	totalSA	No
SCZ	35397024	rs10777187	159.646	0.2261	0.759777	totalSA	No
SCZ	35397025	rs6538539	104.145	0.3402	0.645544	totalSA	No
SCZ	35397026	rs513022	113.465	0.3814	0.604424	totalSA	No
SCZ	35397027	rs10861176	-13.5469	0.9133	0.0844767	totalSA	No
SCZ	35397028	rs3764002	143.557	0.2627	0.723047	totalSA	No
SCZ	35397029	rs4766428	29.0461	0.8029	0.191924	totalSA	No
SCZ	35397030	rs2649999	60.7593	0.608	0.381869	totalSA	No
SCZ	35397031	rs2686386	-30.0899	0.8313	0.164219	totalSA	No
SCZ	35397032	rs61952922	-96.4744	0.3841	0.601729	totalSA	No
SCZ	35397033	rs1790135	-372.169	0.009952	0.985178	totalSA	No
SCZ	35397034	rs1924378	-15.2464	0.8934	0.103815	totalSA	No
SCZ	35397035	rs650520	14.2938	0.9	0.0973892	totalSA	No
SCZ	35397036	rs9603649	-4.6274	0.9668	0.0322837	totalSA	No
SCZ	35397037	rs11619756	66.8942	0.5472	0.441277	totalSA	No
SCZ	35397038	rs1545660	-23.8623	0.8571	0.139147	totalSA	No
SCZ	35397039	rs9597388	-94.7357	0.4963	0.491083	totalSA	No
SCZ	35397040	rs9569820	-43.4986	0.8005	0.194241	totalSA	No
SCZ	35397041	rs12877581	-97.7697	0.4435	0.542859	totalSA	No
SCZ	35397042	rs9545047	-168.644	0.1382	0.848429	totalSA	No
SCZ	35397043	rs61973697	-74.4581	0.5624	0.426418	totalSA	No
SCZ	35397044	rs10148671	-63.2091	0.5852	0.404075	totalSA	No
SCZ	35397045	rs17571951	-37.4161	0.7747	0.219336	totalSA	No
SCZ	35397046	rs12883788	-117.082	0.3058	0.679895	totalSA	No
SCZ	35397047	rs221902	-15.7029	0.8908	0.106356	totalSA	No
SCZ	35397048	rs2190873	-150.144	0.1698	0.81633	totalSA	No
SCZ	35397049	rs4903718	-223.746	0.05742	0.932545	totalSA	No
SCZ	35397050	rs7141857	-199.132	0.07403	0.915037	totalSA	No
SCZ	35397051	rs745467	240.897	0.2577	0.728008	totalSA	No
SCZ	35397052	rs10873538	-63.9296	0.5911	0.398331	totalSA	No
SCZ	35397053	rs2917627	-110.438	0.474	0.513003	totalSA	No
SCZ	35397054	rs56282503	266.159	0.0341	0.957584	totalSA	No
SCZ	35397055	rs2929278	189.74	0.1577	0.828591	totalSA	No
SCZ	35397056	rs653765	-298.28	0.01316	0.981327	totalSA	No
SCZ	35397057	rs11632947	24.1285	0.8265	0.168925	totalSA	No
SCZ	35397058	rs3813567	123.425	0.3759	0.609895	totalSA	No
SCZ	35397059	rs10906984	-15.8	0.8898	0.107327	totalSA	No
SCZ	35397060	rs11638554	-68.184	0.5711	0.417878	totalSA	No
SCZ	35397061	rs4702	53.7641	0.6342	0.356197	totalSA	No
SCZ	35397062	rs79478621	-317.055	0.3179	0.667859	totalSA	No
SCZ	35397063	rs9674103	75.9476	0.5441	0.444296	totalSA	No
SCZ	35397064	rs12925872	-53.6991	0.6785	0.313092	totalSA	No
SCZ	35397065	rs9925915	-173.275	0.1132	0.874165	totalSA	No
SCZ	35397066	rs11862968	187.514	0.1629	0.823335	totalSA	No
SCZ	35397067	rs11647188	-89.8722	0.4282	0.558007	totalSA	No
SCZ	35397068	rs11076631	-181.472	0.109	0.878544	totalSA	No
SCZ	35397069	rs75329315	211.184	0.2955	0.690213	totalSA	No
SCZ	35397070	rs12943566	15.5531	0.8921	0.105092	totalSA	No
SCZ	35397071	rs2189336	37.0434	0.7377	0.255305	totalSA	No
SCZ	35397072	rs959071	-6.8927	0.9694	0.0297644	totalSA	No
SCZ	35397073	rs11263770	-279.526	0.0114	0.983406	totalSA	No
SCZ	35397074	rs4793888	-19.0147	0.8976	0.0997246	totalSA	No
SCZ	35397075	rs6504163	-200.508	0.08957	0.898735	totalSA	No
SCZ	35397076	rs7225476	-31.9265	0.7692	0.224687	totalSA	No
SCZ	35397077	rs8096175	98.1026	0.5186	0.469216	totalSA	No
SCZ	35397078	rs11083369	-219.731	0.08236	0.906211	totalSA	No
SCZ	35397079	rs8084351	113.13	0.2988	0.686918	totalSA	No
SCZ	35397080	rs9636107	67.9839	0.5346	0.453586	totalSA	No
SCZ	35397081	rs715170	-21.3249	0.8633	0.133077	totalSA	No
SCZ	35397082	rs337718	37.4012	0.7536	0.239852	totalSA	No
SCZ	35397083	rs55858161	-94.8338	0.4342	0.552041	totalSA	No
SCZ	35397084	rs322124	140.543	0.3071	0.678615	totalSA	No
SCZ	35397085	rs72986630	107.722	0.689	0.302929	totalSA	No
SCZ	35397086	rs8101499	26.4046	0.823	0.172334	totalSA	No
SCZ	35397087	rs3810450	-466.105	0.121	0.866073	totalSA	No
SCZ	35397088	rs7251	-217.844	0.06933	0.919984	totalSA	No
SCZ	35397089	rs2387414	13.0997	0.9126	0.0851601	totalSA	No
SCZ	35397090	rs758749	4.7814	0.9781	0.0213234	totalSA	No
SCZ	35397091	rs1006945	206.929	0.06037	0.929419	totalSA	No
SCZ	35397092	rs6125656	-65.5871	0.6418	0.348786	totalSA	No
SCZ	35397093	rs229362	111.809	0.4187	0.567445	totalSA	No
SCZ	35397094	rs732381	-3.1224	0.9794	0.0200547	totalSA	No
SCZ	35397095	rs9607782	-205.612	0.1192	0.867941	totalSA	No
SCZ	35397096	rs76365544	207.563	0.6268	0.363478	totalSA	No
SCZ	35397097	rs6010045	51.2584	0.6739	0.31757	totalSA	No

## Sheet: ST6
Desikan_roi	cortical_gradient	MeanAbsES_SA_SNPs	MeanAbsES_CT_CNVs	MeanAbsES_SA_CNVs	MeanAbsES_CT_NPDs	MeanAbsES_SA_NPDs	Var_SA_SNPs	Var_CT_CNVs	Var_SA_CNVs	Var_CT_NPDs	Var_SA_NPDs	Signif_SA_SNPs	Signif_CT_CNVs	Signif_SA_CNVs	Signif_CT_NPDs	Signif_SA_NPDs	PC1_SA_SNPs	PC1_CT_CNVs	PC1_SA_CNVs	PC1_CT_NPDs	PC1_SA_NPDs
bankssts	0.0331769	1.7931	0.214175	0.370508	0.118455	0.0471429	2.16907	0.275354	0.487072	0.102625	0.0576822	40	36.3636	45.4545	36.3636	28.5714	-0.995753	-0.955689	-1.81621	1.10909	-0.893676
caudalanteriorcingulate	1.46101	1.04349	0.191208	0.286951	0.0769091	0.0481429	1.35069	0.242537	0.31394	0.0860039	0.0404575	10	27.2727	36.3636	27.2727	14.2857	-0.11135	-2.7127	-0.0817886	-3.22572	0.108391
caudalmiddlefrontal	0.275685	3.26918	0.272441	0.293973	0.132318	0.0634286	3.84795	0.350236	0.390058	0.12042	0.0705026	30	54.5455	45.4545	36.3636	28.5714	-1.14554	0.885025	-2.53075	1.70894	-0.0906102
cuneus	-1.93673	1.66238	0.313789	0.367564	0.0625909	0.0424286	2.05793	0.423852	0.474384	0.0876134	0.0340427	20	45.4545	45.4545	9.09091	0	1.50775	3.06393	3.04803	-3.67808	-1.27042
entorhinal	1.88639	0.57054	0.192844	0.233288	0.0853182	0.0512857	0.784229	0.246827	0.305732	0.096381	0.0659137	15	18.1818	18.1818	18.1818	14.2857	-0.0836008	-1.5632	-0.449496	-2.47656	-0.742504
fusiform	0.238374	2.57865	0.211453	0.222038	0.180955	0.0691429	2.90592	0.235362	0.172287	0.127071	0.0522827	10	27.2727	27.2727	54.5455	14.2857	0.030594	-1.22022	-0.0666199	3.70602	0.863554
inferiorparietal	-0.350748	5.67108	0.206231	0.219045	0.136455	0.0888571	7.66786	0.272606	0.266671	0.101775	0.0879326	30	27.2727	18.1818	27.2727	14.2857	-4.74463	-0.0922184	-1.30126	2.39934	1.87616
inferiortemporal	0.901091	2.59585	0.217722	0.331894	0.145045	0.0651429	3.33506	0.276127	0.317676	0.124011	0.0864782	15	27.2727	45.4545	27.2727	28.5714	-0.957522	-3.03954	-1.32347	2.27291	0.503281
isthmuscingulate	-0.299802	1.07973	0.276942	0.309342	0.0894545	0.0762857	1.35639	0.30849	0.323318	0.109738	0.0960625	10	45.4545	54.5455	18.1818	28.5714	0.251966	0.88405	1.38538	-1.6884	0.0597285
lateraloccipital	-1.66071	5.2704	0.167803	0.350385	0.115773	0.0371429	7.13821	0.233609	0.442129	0.101438	0.0488087	30	27.2727	36.3636	36.3636	14.2857	5.13468	-0.120813	2.38183	0.986844	-1.10069
lateralorbitofrontal	1.09738	2.51141	0.174174	0.463872	0.116773	0.0764286	3.29857	0.277621	0.604053	0.130262	0.061472	25	18.1818	63.6364	18.1818	28.5714	0.213256	-1.52679	-2.16035	0.417946	2.27623
lingual	-1.77285	5.09084	0.255677	0.334269	0.0905	0.039	6.18402	0.347863	0.404815	0.112628	0.0398192	45	27.2727	45.4545	18.1818	0	5.25501	1.71685	2.62675	-1.17566	-0.596359
medialorbitofrontal	1.55537	1.38041	0.266289	0.250908	0.118545	0.081	1.72793	0.32091	0.324345	0.118128	0.0844469	15	54.5455	27.2727	54.5455	28.5714	-0.362111	0.0407468	-1.58239	0.180239	2.86607
middletemporal	0.778488	3.49874	0.247712	0.294616	0.153591	0.0698571	4.94474	0.319849	0.341948	0.123677	0.0845309	45	36.3636	45.4545	36.3636	14.2857	-1.09252	-1.32844	-1.56827	2.944	0.368087
parahippocampal	0.331117	0.69535	0.223279	0.224165	0.0977273	0.0484286	0.904847	0.25171	0.311368	0.0740717	0.0653245	10	27.2727	27.2727	9.09091	14.2857	-0.133426	-0.627333	-0.308946	-0.454649	0.785147
paracentral	-0.309546	1.35374	0.207454	0.243414	0.110182	0.0685714	1.99752	0.271571	0.282763	0.107234	0.0880292	20	18.1818	27.2727	27.2727	14.2857	-1.03685	0.622415	0.318758	0.0633234	1.42554
parsopercularis	0.687657	2.30485	0.226169	0.213293	0.141273	0.0378571	3.09594	0.267248	0.291955	0.131261	0.026435	25	45.4545	36.3636	27.2727	0	-0.903157	0.399498	-1.31408	1.41336	-1.46618
parsorbitalis	0.468373	0.877245	0.214675	0.375881	0.102545	0.0674286	1.08707	0.264274	0.451509	0.125621	0.0312722	40	27.2727	63.6364	18.1818	14.2857	0.117857	-0.999938	-0.423859	-0.740416	0.899746
parstriangularis	0.637188	2.09176	0.332965	0.262934	0.133455	0.0591429	3.30409	0.412413	0.331234	0.150431	0.0388477	25	54.5455	27.2727	27.2727	0	-0.139734	1.02597	1.11723	0.283961	-1.06401
pericalcarine	-2.46071	2.99846	0.415092	0.33418	0.0482273	0.0221429	3.83217	0.545319	0.396458	0.0558428	0.0258632	35	63.6364	45.4545	0	0	2.99483	4.60701	2.55575	-6.37877	-1.55275
postcentral	-0.80959	2.97723	0.360241	0.349455	0.0930455	0.0504286	3.86431	0.426783	0.417108	0.0845745	0.052605	15	54.5455	45.4545	27.2727	14.2857	1.24861	2.23426	2.0973	-0.802818	0.0724899
posteriorcingulate	0.549325	1.39725	0.201615	0.189623	0.117455	0.0791429	1.8825	0.238995	0.225231	0.124003	0.0793344	25	27.2727	9.09091	36.3636	28.5714	-0.96767	-0.727321	-0.752289	-0.591335	2.02361
precentral	-0.408985	4.6857	0.251503	0.316034	0.140773	0.043	6.10972	0.3029	0.432654	0.0954587	0.0642625	15	36.3636	27.2727	36.3636	14.2857	-3.99546	-0.169817	-1.93564	1.82889	-0.511292
precuneus	-0.650439	4.26706	0.314802	0.43301	0.116409	0.0582857	5.69187	0.413996	0.524487	0.0880928	0.0763675	30	45.4545	72.7273	27.2727	28.5714	1.6677	1.64052	3.88282	1.28151	0.376946
rostralanteriorcingulate	1.88188	0.88591	0.149529	0.252681	0.0966818	0.0465714	1.00911	0.135656	0.303052	0.0951492	0.0481679	15	9.09091	27.2727	27.2727	14.2857	-0.398847	-0.429154	-0.664304	-1.24529	0.424911
rostralmiddlefrontal	0.516318	3.71233	0.315325	0.32288	0.136364	0.0535714	4.30944	0.371733	0.361382	0.138576	0.0558804	15	45.4545	54.5455	36.3636	14.2857	-3.19111	0.953362	-1.44197	1.37606	0.222131
superiorfrontal	0.678729	5.60485	0.317364	0.381139	0.134364	0.0762857	6.89036	0.380208	0.458911	0.155443	0.0573925	40	45.4545	54.5455	27.2727	28.5714	-2.35921	0.694188	-3.25577	0.566961	0.892712
superiorparietal	-0.597087	4.87546	0.222655	0.391698	0.0953182	0.0325714	6.6533	0.343175	0.543388	0.0811648	0.0344114	15	18.1818	45.4545	27.2727	0	4.47732	1.41202	3.64351	-0.328534	-1.64961
superiortemporal	0.517108	2.98231	0.312039	0.260673	0.132636	0.0581429	4.16747	0.39695	0.354228	0.13538	0.0592239	30	45.4545	27.2727	36.3636	14.2857	-0.386106	-2.44368	-0.448531	1.50106	-0.40869
supramarginal	-0.097169	3.88786	0.31257	0.142145	0.134773	0.0591429	4.73938	0.412136	0.119837	0.115745	0.0710493	20	45.4545	18.1818	36.3636	28.5714	1.5529	1.02201	0.554427	1.89897	0.575892
frontalpole	0.896844	0.255985	0.209584	0.26896	0.0716818	0.0667143	0.32505	0.25481	0.279966	0.101753	0.0989557	10	45.4545	36.3636	27.2727	14.2857	0.000454293	-0.413957	-0.517369	-2.90131	-3.05104
temporalpole	2.08147	0.439255	0.197738	0.178665	0.103318	0.0264286	0.545797	0.252687	0.248809	0.0932428	0.0445865	10	27.2727	36.3636	27.2727	0	-0.0127372	-2.47239	1.50531	-1.25	-0.389928
transversetemporal	-0.426981	0.696875	0.23235	0.23022	0.0910909	0.0515714	1.01138	0.281967	0.254164	0.0945196	0.0601969	30	27.2727	27.2727	18.1818	14.2857	-0.0460457	-1.65462	0.140219	-0.73845	-2.79867
insula	0.739782	2.16108	0.3527	0.44309	0.126545	0.0598571	2.74218	0.436196	0.568024	0.116796	0.0646319	25	63.6364	63.6364	45.4545	14.2857	-1.38955	1.29596	-1.31395	1.73656	0.965794

## Sheet: ST7
concensus_measure	map	cor	pspin	leave1out_cor_95CI_lower	leave1out_cor_95CI_upper
mean_abs_effect_size	SA_SNPs	-0.48	0.0242
mean_abs_effect_size	CT_CNVs	-0.43	0.0095	-0.5	-0.32
mean_abs_effect_size	SA_CNVs	-0.3	0.0196	-0.33	-0.25
mean_abs_effect_size	CT_NPDs	0.28	0.09295	0.2	0.33
mean_abs_effect_size	SA_NPDs	0.32	0.03255	0.19	0.36
effect_size_variance	SA_SNPs	-0.48	0.0267
effect_size_variance	CT_CNVs	-0.52	0.0049	-0.58	-0.42
effect_size_variance	SA_CNVs	-0.26	0.03965	-0.31	-0.18
effect_size_variance	CT_NPDs	0.38	0.0526	0.28	0.49
effect_size_variance	SA_NPDs	0.24	0.07695	0.16	0.31
percent_significance	SA_SNPs	-0.35	0.03775
percent_significance	CT_CNVs	-0.24	0.0946	-0.37	-0.13
percent_significance	SA_CNVs	-0.17	0.1222	-0.21	-0.11
percent_significance	CT_NPDs	0.35	0.0318	0.28	0.46
percent_significance	SA_NPDs	0.27	0.0575	0.08	0.36
PC1	SA_SNPs	-0.49	0.011
PC1	CT_CNVs	-0.69	0.00055
PC1	SA_CNVs	-0.59	0.0086
PC1	CT_NPDs	0.2	0.1664
PC1	SA_NPDs	0.32	0.0231

## Sheet: ST8
Disorder	PRS description	sample size (MRI and PRS, N)	Age (Mean (SD) in years)	Sex (M/F)	Ancestry	PRS field UKBB	PubMedID_data_source
BD	Standard PRS for bipolar disorder (BD)	31413	63.72 (7.5)	14712/16701	European	26214	39292644
SCZ	Standard PRS for schizophrenia (SCZ)	31413	63.72 (7.5)	14712/16701	European	26275	39292644

[truncated: 3 more sheets: ST9, ST10, ST11]
